# Supplementary material for: Packing polymorphism, odd–even alternation and thermotropic phase transitions in N-,O-diacylethanolamines with varying N-acyl chains. A combined experimental and computational study
Source: Royal Society of Chemistry journal article supplement (doi:10.1039/d1cp03704h), 2021-01-01
Supplement: d1cp03704h1.pdf [file d1cp03704h1.pdf]

**Supplementary data**

**to**

**Packing polymorphism, odd-even alternation and thermotropic phase transitions in  
*N*-, *O*-diacylethanolamines with varying *N*-acyl chains. A combined experimental and  
computational study**

Soudherpally Thirupathi Reddy,<sup>§</sup> Dokku Sivaramakrishna,<sup>§</sup> Keerthi Mamatha,<sup>#</sup> Manju Sharma,\*

Musti J. Swamy\*

School of Chemistry, University of Hyderabad, Hyderabad – 500046, India

<sup>§</sup>These two authors contributed equally to this study

Running Title: Packing polymorphism in mixed-chain diacylethanolamines

\*Corresponding authors:

Prof. Musti J. Swamy, School of Chemistry, University of Hyderabad, Hyderabad - 500 046,  
India. Tel: +91-40-2313-4807, E-mail: mjswamy@uohyd.ac.in, mjswamy1@gmail.com

Dr. Manju Sharma, School of Chemistry, University of Hyderabad, Hyderabad - 500 046, India.  
Tel: +91-40-2313-4835, E-mail: manjusharma@uohyd.ac.in

<sup>§</sup>These two authors contributed equally to this study.

<sup>#</sup>Present address: Department of Chemistry, Telangana Social Welfare Residential Degree  
College, Jagathgirigutta, Hyderabad – 500078, India.

## S1. RESULTS AND DISCUSSION

### S1.1. Synthesis and Characterization of *N*-acyl-*O*-palmitoylethanolamines and *N*-acyl-*O*-pentadecanoylethanolamines.

The homologous series of *N*-acyl-*O*-palmitoylethanolamines (Nn-O16s) and *N*-acyl-*O*-pentadecanoylethanolamines (Nn-O15s) synthesized in the present study were characterized by FTIR, <sup>1</sup>H-NMR and <sup>13</sup>C-NMR spectroscopies. A representative FTIR spectrum of *N*-myristoyl-*O*-palmitoylethanolamine (N14-O16) is given in Fig. S1. FTIR spectra of mixed chain DAEs (Nn-O16s and Nn-O15s) contained absorption bands due to the ester linkage at 1730-1742 cm<sup>-1</sup>, amide linkage at 1638-1643 cm<sup>-1</sup> (amide-I) and 1544-1556 cm<sup>-1</sup> (amide-II). The C–H stretching bands were observed at 2909-2920 cm<sup>-1</sup> and 2843-2854 cm<sup>-1</sup>. All DAEs with mixed acyl chains exhibited split bands corresponding to C–H bending (scissoring mode, 1462-1479 cm<sup>-1</sup>) and rocking (712-728 cm<sup>-1</sup>), which is characteristic of O<sub>⊥</sub> chain packing.<sup>1</sup> The N–H stretching bands were observed between 3293 and 3315 cm<sup>-1</sup>. Since the chemical structures of all the compounds are similar, except for the acyl chain length, they gave similar spectra and the specific band positions corresponding to the individual Nn-O16s and Nn-O15s are listed in Tables S1 and S2, respectively. <sup>1</sup>H-NMR spectra of Nn-O16s and Nn-O15s gave the following resonances: 0.87-0.90 δ (3H, t), 1.26-1.30 δ (nH, bs), 2.17-2.21 δ (2H, t), 2.32-2.34 δ (2H, t), 3.51-3.54 δ (2H, q), 4.17-4.19 δ (2H, t), 5.72-5.97 δ (1H, bs). The resonances are consistent with the structures of Nn-O16s and Nn-O15s and a representative spectrum of *N*-myristoyl-*O*-palmitoylethanolamine is given in Fig. S2. Since all the compounds are structurally rather similar, their <sup>1</sup>H-NMR spectra were almost identical except for the value of integration in the peak corresponding to the polymethylene portion of the acyl chain, seen at 1.26-1.3δ. The details of key resonances corresponding to individual Nn-O16s and Nn-O15s investigated are listed in Table S3 and S4, respectively.

$^{13}\text{C}$ -NMR spectral data for Nn-O16s and Nn-O15s are given in Table S5 and S6, respectively. A representative  $^{13}\text{C}$ -NMR spectrum of *N*-myristoyl-*O*-palmitoylethanolamine is given in Fig. S3. This spectrum shows a resonance at 14.10  $\delta$  corresponding to end methyl groups of *N*-myristoyl and *O*-palmitoyl chains. Methylene groups present in both the chains show resonances at 22.68, 24.93, 25.69, 31.92, 34.19, 36.73, 38.83, 63.07  $\delta$  and resonances between 29.16 to 29.68  $\delta$  (seven peaks with the peak at 29.48  $\delta$  being more intense than others) and two resonances at 173.28 and 173.98  $\delta$  corresponding to amide carbonyl and ester carbonyl carbons, respectively. These resonances are consistent with the structure of *N*-myristoyl-*O*-palmitoylethanolamine. All other mixed-chain DAEs (Nn-O16s and Nn-O15s) also show essentially identical spectra, except for the peak at  $\sim 29.48$   $\delta$  whose intensity increased with increase in the chain length. These results, obtained from FTIR,  $^1\text{H}$ - and  $^{13}\text{C}$ -NMR spectroscopic measurements on Nn-O16s and Nn-O15s, are consistent with their structures and indicate that they are of high purity.

**S1.2. Analysis of crystal packing of N13-O16.** Packing arrangement of molecules in the crystal lattice of N13-O16, viewed along the *c*-axis and *b*-axis are shown in Fig. S6A and S6B, respectively. The packing of N13-O16 molecules in the crystal lattice is similar to that found for N12-O16 with the closest methyl-methyl distance between opposite layers and the same layer being 3.880 Å and 4.876 Å, respectively. The layer thickness (C1–C31 distance) in N13-O16 is 33.813 Å and the *all-trans* *N*- and *O*-acyl chains of the molecule are tilted by 35.65° and 34.91°, respectively, with respect to the layer normal to the respective methyl end planes, whereas the angle between *N*-tridecanoyl and *O*-palmitoyl chains is 109.9°.

## REFERENCES

1. Di, L.; Small, D. M. Physical Behavior of the Hydrophobic Core of Membranes: Properties of 1-Stearoyl-2-Linoleoyl-sn-Glycerol. *Biochemistry* 1995, 34, 16672–16677.

**Table S1:** Assignment of resonances in the IR spectra of *N*-acyl-*O*-palmitoylethanolamines (Nn-O16s).

| Acyl chain length | Amide (cm <sup>-1</sup> ) |                   |             | Ester (cm <sup>-1</sup> ) |             | C-H (cm <sup>-1</sup> ) |                  |               |
|-------------------|---------------------------|-------------------|-------------|---------------------------|-------------|-------------------------|------------------|---------------|
|                   | C=O Amide-1               | N-H (def) Amide-2 | N-H Stretch | C=O                       | C-O Stretch | C-H (Stretch)           | C-H (Scissoring) | C-H (Rocking) |
| C <sub>8</sub>    | ~1641                     | ~1554             | ~3300       | ~1734                     | ~1184       | ~2849-2916              | ~1471            | ~717          |
| C <sub>9</sub>    | ~1643                     | ~1556             | ~3302       | ~1736                     | ~1182       | ~2851-2918              | ~1471            | ~719          |
| C <sub>10</sub>   | ~1643                     | ~1550             | ~3293       | ~1742                     | ~1178       | ~2854-2920              | ~1468            | ~723          |
| C <sub>11</sub>   | ~1641                     | ~1556             | ~3304       | ~1736                     | ~1182       | ~2851-2918              | ~1471            | ~719          |
| C <sub>12</sub>   | ~1638                     | ~1545             | ~3298       | ~1736                     | ~1178       | ~2843-2915              | ~1468            | ~712          |
| C <sub>13</sub>   | ~1641                     | ~1556             | ~3304       | ~1736                     | ~1180       | ~2851-2918              | ~1471            | ~719          |
| C <sub>14</sub>   | ~1641                     | ~1554             | ~3300       | ~1734                     | ~1199       | ~2849-2916              | ~1471            | ~717          |
| C <sub>15</sub>   | ~1643                     | ~1554             | ~3315       | ~1734                     | ~1184       | ~2849-2918              | ~1471            | ~719          |

**Table S2:** Assignment of resonances in the IR spectra of *N*-acyl-*O*-pentadecanoylethanolamines (Nn-O15s).

| Acyl chain length | Amide (cm <sup>-1</sup> ) |                   |             | Ester (cm <sup>-1</sup> ) |             | C-H (cm <sup>-1</sup> ) |                  |               |
|-------------------|---------------------------|-------------------|-------------|---------------------------|-------------|-------------------------|------------------|---------------|
|                   | C=O Amide-1               | N-H (def) Amide-2 | N-H Stretch | C=O                       | C-O Stretch | C-H (Stretch)           | C-H (Scissoring) | C-H (Rocking) |
| C <sub>8</sub>    | ~1643                     | ~1556             | ~3304       | ~1731                     | ~1189       | ~2854-2920              | ~1479            | ~717          |
| C <sub>9</sub>    | ~1638                     | ~1550             | ~3298       | ~1731                     | ~1183       | ~2849-2909              | ~1463            | ~712          |
| C <sub>10</sub>   | ~1643                     | ~1544             | ~3298       | ~1730                     | ~1177       | ~2843-2909              | ~1462            | ~728          |
| C <sub>11</sub>   | ~1638                     | ~1550             | ~3304       | ~1731                     | ~1183       | ~2843-2909              | ~1468            | ~723          |
| C <sub>12</sub>   | ~1643                     | ~1556             | ~3309       | ~1742                     | ~1183       | ~2849-2920              | ~1468            | ~717          |
| C <sub>13</sub>   | ~1638                     | ~1556             | ~3315       | ~1731                     | ~1190       | ~2849-2915              | ~1468            | ~728          |
| C <sub>14</sub>   | ~1637                     | ~1555             | ~3309       | ~1736                     | ~1177       | ~2843-2920              | ~1467            | ~717          |

**Table S3:** <sup>1</sup>H-NMR spectral data of *N*-acyl-*O*-palmitoylethanolamines (Nn-O16s).

| Acyl chain length | Amide moiety        |         |                     | Ester group           |                     | Acyl chains     |                                 |
|-------------------|---------------------|---------|---------------------|-----------------------|---------------------|-----------------|---------------------------------|
|                   | CH <sub>2</sub> -CO | N-H     | CH <sub>2</sub> -NH | CH <sub>2</sub> -O-CO | CH <sub>2</sub> -CO | CH <sub>3</sub> | (CH <sub>2</sub> ) <sub>n</sub> |
| C <sub>8</sub>    | 2.18, t             | 5.74, s | 3.53, t             | 4.17, t               | 2.32, t             | 0.88, t         | 1.27, m                         |
| C <sub>9</sub>    | 2.18, t             | 5.73, s | 3.52, t             | 4.17, t               | 2.32, t             | 0.88, t         | 1.26, m                         |
| C <sub>10</sub>   | 2.18, t             | 5.74, s | 3.52, t             | 4.17, t               | 2.32, t             | 0.88, t         | 1.26, m                         |
| C <sub>11</sub>   | 2.18, t             | 5.73, s | 3.52, t             | 4.17, t               | 2.32, t             | 0.88, t         | 1.26, m                         |
| C <sub>12</sub>   | 2.18, t             | 5.72, s | 3.53, t             | 4.17, t               | 2.32, t             | 0.88, t         | 1.26, m                         |
| C <sub>13</sub>   | 2.17, t             | 5.74, s | 3.52, t             | 4.17, t               | 2.32, t             | 0.87, t         | 1.26, m                         |
| C <sub>14</sub>   | 2.19, t             | 5.82, s | 3.54, t             | 4.18, t               | 2.33, t             | 0.89, t         | 1.27, m                         |
| C <sub>15</sub>   | 2.17, t             | 5.73, s | 3.53, t             | 4.17, t               | 2.32, t             | 0.88, t         | 1.26, m                         |

**Table S4:** <sup>1</sup>H-NMR spectral data of *N*-acyl-*O*-pentadecanoylethanolamines (Nn-O15s).

| Acyl chain length | Amide moiety        |         |                     | Ester group           |                     | Acyl chains     |                                 |
|-------------------|---------------------|---------|---------------------|-----------------------|---------------------|-----------------|---------------------------------|
|                   | CH <sub>2</sub> -CO | N-H     | CH <sub>2</sub> -NH | CH <sub>2</sub> -O-CO | CH <sub>2</sub> -CO | CH <sub>3</sub> | (CH <sub>2</sub> ) <sub>n</sub> |
| C <sub>8</sub>    | 2.21, t             | 5.84, s | 3.54, t             | 4.19, t               | 2.34, t             | 0.90, t         | 1.30, m                         |
| C <sub>9</sub>    | 2.19, t             | 5.84, s | 3.54, t             | 4.19, t               | 2.34, t             | 0.90, t         | 1.28, m                         |
| C <sub>10</sub>   | 2.18, t             | 5.88, s | 3.52, t             | 4.17, t               | 2.32, t             | 0.88, t         | 1.29, m                         |
| C <sub>11</sub>   | 2.19, t             | 5.78, s | 3.53, t             | 4.19, t               | 2.34, t             | 0.90, t         | 1.30, m                         |
| C <sub>12</sub>   | 2.19, t             | 5.97, s | 3.51, t             | 4.17, t               | 2.32, t             | 0.88, t         | 1.29, m                         |
| C <sub>13</sub>   | 2.19, t             | 5.78, s | 3.53, t             | 4.19, t               | 2.34, t             | 0.90, t         | 1.27, m                         |
| C <sub>14</sub>   | 2.20, t             | 5.84, s | 3.53, t             | 4.18, t               | 2.33, t             | 0.89, t         | 1.27, m                         |

**Table S5:**  $^{13}\text{C}$ -NMR spectral data of *N*-acyl-*O*-palmitoylethanolamines (Nn-O16s).

| Acyl chain length | $\text{CH}_3\text{-CH}_2\text{-(CH}_2\text{)}_n$ | $\text{CH}_2\text{-(CH}_2\text{)}_n$ | $(\text{CH}_2)_n$ | $\text{CH}_2\text{-COOR}$ | $\text{COO-CH}_2\text{-CH}_2\text{-NH}$ | $\text{COO-CH}_2\text{-CH}_2\text{-NH}$ | $\text{HN-CO-CH}_2$ | $\text{R-COO}$ | $\text{NH-C=O}$ |
|-------------------|--------------------------------------------------|--------------------------------------|-------------------|---------------------------|-----------------------------------------|-----------------------------------------|---------------------|----------------|-----------------|
| 8                 | 14.10                                            | 22.66                                | 24.94-31.93       | 34.20                     | 63.11                                   | 38.85                                   | 36.76               | 174.04         | 173.30          |
| 9                 | 14.07                                            | 22.65                                | 24.92-31.91       | 34.18                     | 63.05                                   | 38.81                                   | 36.70               | 173.97         | 173.32          |
| 10                | 14.09                                            | 22.66                                | 24.92-31.91       | 34.18                     | 62.99                                   | 38.92                                   | 36.62               | 173.99         | 173.54          |
| 11                | 14.08                                            | 22.66                                | 24.92-31.91       | 34.17                     | 63.02                                   | 38.82                                   | 36.68               | 173.95         | 173.37          |
| 12                | 14.08                                            | 22.67                                | 24.92-31.91       | 34.17                     | 63.03                                   | 38.82                                   | 36.69               | 173.96         | 173.35          |
| 13                | 14.07                                            | 22.66                                | 24.91-31.90       | 34.16                     | 62.99                                   | 38.81                                   | 36.66               | 173.93         | 173.39          |
| 14                | 14.10                                            | 22.68                                | 24.93-31.92       | 34.19                     | 63.07                                   | 38.83                                   | 36.73               | 173.98         | 173.28          |
| 15                | 14.11                                            | 22.69                                | 24.92-31.92       | 34.18                     | 63.02                                   | 38.85                                   | 36.67               | 173.99         | 173.45          |

**Table S6:**  $^{13}\text{C}$ -NMR spectral data of *N*-acyl-*O*-pentadecanoylethanolamines (Nn-O15s).

| Acyl chain length | $\text{CH}_3\text{-CH}_2\text{-(CH}_2\text{)}_n$ | $\text{-CH}_2\text{-(CH}_2\text{)}_n$ | $\text{-(CH}_2\text{)}_n\text{-}$ | $\text{-CH}_2\text{-COOR}$ | $(\text{COO)-CH}_2\text{-CH}_2\text{-NH}$ | $(\text{COO)-CH}_2\text{-CH}_2\text{-NH}$ | $\text{HN-CO-CH}_2$ | $\text{-CH}_2\text{-COO}$ | $\text{NH-C=O}$ |
|-------------------|--------------------------------------------------|---------------------------------------|-----------------------------------|----------------------------|-------------------------------------------|-------------------------------------------|---------------------|---------------------------|-----------------|
| 8                 | 14.09                                            | 22.65                                 | 24.93-31.92                       | 34.20                      | 63.08                                     | 38.91                                     | 36.70               | 174.06                    | 173.43          |
| 9                 | 14.10                                            | 22.66                                 | 24.92-31.92                       | 34.18                      | 63.05                                     | 38.81                                     | 36.71               | 174.00                    | 173.36          |
| 10                | 14.10                                            | 22.67                                 | 24.92-31.91                       | 34.18                      | 63.05                                     | 38.80                                     | 36.71               | 173.98                    | 173.33          |
| 11                | 14.12                                            | 22.69                                 | 24.93-31.92                       | 34.19                      | 63.03                                     | 38.89                                     | 36.67               | 174.03                    | 173.49          |
| 12                | 14.09                                            | 22.67                                 | 24.91-31.91                       | 34.17                      | 63.01                                     | 38.82                                     | 36.67               | 173.97                    | 173.43          |
| 13                | 14.12                                            | 22.69                                 | 24.93-31.93                       | 34.19                      | 63.07                                     | 38.85                                     | 36.73               | 174.02                    | 173.37          |
| 14                | 14.11                                            | 22.69                                 | 24.93-31.92                       | 34.19                      | 63.07                                     | 38.84                                     | 36.73               | 174.01                    | 173.35          |

**Table S7.** Average values of transition temperatures ( $T_t$ ), transition enthalpies ( $\Delta H_t$ ), and transition entropies ( $\Delta S_t$ ) of *N*-acyl-*O*-palmitoylethanolamines (Nn-O16s) and *N*-acyl-*O*-pentadecanoylethanolamines (Nn-O15s) in the dry state. The standard deviations indicated correspond to at least 3 independent measurements.

| Acyl<br>chain<br>length | Nn-O16s     |                                           |                                                           | Nn-O15s     |                                           |                                                           |
|-------------------------|-------------|-------------------------------------------|-----------------------------------------------------------|-------------|-------------------------------------------|-----------------------------------------------------------|
|                         | $T_t$ (°C)  | $\Delta H_t$<br>(kcal.mol <sup>-1</sup> ) | $\Delta S_t$<br>(cal.mol <sup>-1</sup> .K <sup>-1</sup> ) | $T_t$ (°C)  | $\Delta H_t$<br>(kcal.mol <sup>-1</sup> ) | $\Delta S_t$<br>(cal.mol <sup>-1</sup> .K <sup>-1</sup> ) |
| 8                       | 75.8 (±0.1) | 17.87 (±0.29)                             | 51.2 (±0.8)                                               | 72.9 (±0.1) | 13.69 (±0.12)                             | 39.6 (±0.3)                                               |
| 9                       | 76.7 (±0.1) | 15.81 (±0.21)                             | 45.2 (±0.6)                                               | 74.3 (±0.1) | 14.81 (±0.16)                             | 42.7 (±0.5)                                               |
| 10                      | 78.8 (±0.1) | 20.35 (±0.17)                             | 57.9 (±0.5)                                               | 75.5 (±0.1) | 16.58 (±0.13)                             | 47.6 (±0.4)                                               |
| 11                      | 79.2 (±0.1) | 19.29 (±0.42)                             | 54.8 (±1.2)                                               | 77.3 (±0.1) | 16.72 (±0.13)                             | 47.7 (±0.4)                                               |
| 12                      | 82.3 (±0.1) | 23.32 (±0.14)                             | 65.6 (±0.4)                                               | 78.8 (±0.1) | 19.54 (±0.38)                             | 55.6 (±1.1)                                               |
| 13                      | 83.1 (±0.1) | 22.96 (±0.22)                             | 64.5 (±0.6)                                               | 80.2 (±0.1) | 21.74 (±0.13)                             | 61.6 (±0.4)                                               |
| 14                      | 86.6 (±0.1) | 24.76 (±0.37)                             | 68.8 (±1.0)                                               | 82.4 (±0.2) | 22.72 (±0.16)                             | 63.9 (±0.5)                                               |
| 15                      | 86.0 (±0.1) | 24.23 (±0.27)                             | 68.0 (±1.1)                                               | -           | -                                         | -                                                         |



**Table S8:** Fractional atomic coordinates ( $\times 10^4$ ) and equivalent isotropic displacement parameters ( $\text{\AA}^2 \times 10^3$ ) for the *N*-lauroyl-*O*-palmitoylethanolamine (N12-O16).  $U(\text{eq})$  is defined as one third of the trace of the orthogonalized  $U_{ij}$  tensor [ $U(\text{eq}) = \frac{1}{3} \sum_i \sum_j U_{ij} a_{i^*} a_{j^*} a_i a_j \cos(a_i, a_j)$ ].

| Atom  | x       | y        | z        | U(eq)  |
|-------|---------|----------|----------|--------|
| C(1)  | 4801(1) | 4406(13) | 1416(6)  | 85(2)  |
| C(2)  | 4697(1) | 5552(11) | 2700(6)  | 67(1)  |
| C(3)  | 4498(1) | 4404(9)  | 2819(5)  | 53(1)  |
| C(4)  | 4391(1) | 5557(9)  | 4088(5)  | 53(1)  |
| C(5)  | 4193(1) | 4413(9)  | 4249(5)  | 51(1)  |
| C(6)  | 4089(1) | 5583(9)  | 5518(5)  | 47(1)  |
| C(7)  | 3890(1) | 4435(9)  | 5667(5)  | 47(1)  |
| C(8)  | 3790(1) | 5605(8)  | 6977(4)  | 42(1)  |
| C(9)  | 3588(1) | 4554(8)  | 7145(4)  | 40(1)  |
| C(10) | 3499(1) | 5692(8)  | 8505(4)  | 36(1)  |
| C(11) | 3298(1) | 4607(8)  | 8704(4)  | 39(1)  |
| C(12) | 3154(1) | 5644(7)  | 7515(4)  | 32(1)  |
| C(13) | 2907(1) | 4476(10) | 5599(6)  | 62(1)  |
| C(14) | 2727(1) | 5079(15) | 6145(7)  | 105(2) |
| C(15) | 2446(1) | 4717(11) | 4572(6)  | 62(1)  |
| C(16) | 2326(1) | 5878(9)  | 3316(5)  | 51(1)  |
| C(17) | 2134(1) | 4607(9)  | 3043(5)  | 53(1)  |
| C(18) | 2020(1) | 5766(9)  | 1697(5)  | 51(1)  |
| C(19) | 1825(1) | 4486(9)  | 1398(5)  | 52(1)  |
| C(20) | 1717(1) | 5653(9)  | 22(5)    | 49(1)  |
| C(21) | 1521(1) | 4431(9)  | -300(5)  | 50(1)  |
| C(22) | 1415(1) | 5593(9)  | -1677(5) | 47(1)  |
| C(23) | 1216(1) | 4401(9)  | -1983(5) | 49(1)  |

|       |         |          |          |        |
|-------|---------|----------|----------|--------|
| C(24) | 1114(1) | 5594(9)  | -3373(5) | 48(1)  |
| C(25) | 914(1)  | 4420(9)  | -3693(5) | 50(1)  |
| C(26) | 809(1)  | 5588(9)  | -5062(5) | 51(1)  |
| C(27) | 608(1)  | 4410(10) | -5373(5) | 56(1)  |
| C(28) | 505(1)  | 5571(10) | -6746(5) | 60(1)  |
| C(29) | 303(1)  | 4414(12) | -7045(6) | 75(2)  |
| C(30) | 200(1)  | 5555(13) | -8428(7) | 90(2)  |
| N(1)  | 3049(1) | 3782(7)  | 6792(4)  | 44(1)  |
| O(1)  | 3138(1) | 8080(5)  | 7238(4)  | 57(1)  |
| O(2)  | 2601(1) | 5937(11) | 4872(6)  | 127(2) |
| O(3)  | 2402(1) | 2898(13) | 5267(7)  | 186(3) |

---

**Table S9:** Selected bond distances (Å) and bond angles (degrees) for *N*-lauroyl-*O*-palmitoylethanolamine (N12-O16).

| Bond distances (Å) |          | Bond angle (degree) |          |
|--------------------|----------|---------------------|----------|
| C(2)-C(1)          | 1.485(7) | C(1)-C(2)-C(3)      | 113.1(4) |
| C(3)-C(2)          | 1.489(6) | C(2)-C(3)-C(4)      | 114.0(4) |
| C(3)-C(4)          | 1.491(6) | C(5)-C(4)-C(3)      | 115.2(4) |
| C(5)-C(4)          | 1.484(5) | C(6)-C(5)-C(4)      | 114.3(4) |
| C(5)-C(6)          | 1.481(6) | C(5)-C(6)-C(7)      | 114.0(3) |
| C(6)-C(7)          | 1.497(5) | C(6)-C(7)-C(8)      | 112.8(3) |
| C(8)-C(7)          | 1.494(6) | C(9)-C(8)-C(7)      | 114.4(3) |
| C(9)-C(8)          | 1.496(5) | C(10)-C(9)-C(8)     | 112.3(3) |
| C(9)-C(10)         | 1.492(5) | C(9)-C(10)-C(11)    | 112.8(3) |
| C(11)-C(10)        | 1.502(5) | C(12)-C(11)-C(10)   | 112.4(3) |
| C(11)-C(12)        | 1.501(5) | C(12)-N(1)-C(13)    | 122.7(4) |
| N(1)-C(12)         | 1.309(5) | O(1)-C(12)-N(1)     | 121.9(4) |
| N(1)-C(13)         | 1.449(5) | O(1)-C(12)-C(11)    | 121.5(3) |
| O(1)-C(12)         | 1.211(4) | N(1)-C(12)-C(11)    | 116.6(3) |
| C(13)-C(14)        | 1.387(7) | C(13)-C(14)-O(2)    | 107.2(5) |
| O(2)-C(14)         | 1.452(6) | O(2)-C(15)-C(16)    | 115.4(4) |
| C(15)-O(2)         | 1.241(5) | O(3)-C(15)-O(2)     | 120.5(5) |
| C(15)-O(3)         | 1.128(6) | O(3)-C(15)-C(16)    | 124.0(5) |
| C(16)-C(15)        | 1.472(6) | C(15)-O(2)-C(14)    | 120.4(5) |
| C(17)-C(16)        | 1.472(5) | C(15)-C(16)-C(17)   | 115.8(4) |
| C(18)-C(17)        | 1.508(5) | C(16)-C(17)-C(18)   | 113.8(4) |
| C(19)-C(18)        | 1.496(5) | C(19)-C(18)-C(17)   | 114.5(4) |
| C(19)-C(20)        | 1.512(5) | C(18)-C(19)-C(20)   | 113.1(4) |
| C(21)-C(20)        | 1.496(5) | C(21)-C(20)-C(19)   | 114.4(4) |
| C(21)-C(22)        | 1.504(5) | C(20)-C(21)-C(22)   | 113.9(3) |
| C(23)-C(22)        | 1.502(5) | C(23)-C(22)-C(21)   | 113.9(3) |
| C(24)-C(23)        | 1.512(5) | C(22)-C(23)-C(24)   | 112.9(4) |
| C(24)-C(25)        | 1.505(5) | C(25)-C(24)-C(23)   | 113.5(4) |

|             |          |                   |          |
|-------------|----------|-------------------|----------|
| C(26)-C(25) | 1.497(5) | C(26)-C(25)-C(24) | 114.3(4) |
| C(26)-C(27) | 1.512(5) | C(25)-C(26)-C(27) | 114.0(4) |
| C(27)-C(28) | 1.495(6) | C(28)-C(27)-C(26) | 113.8(4) |
| C(28)-C(29) | 1.515(6) | C(27)-C(28)-C(29) | 113.7(4) |
| C(29)-C(30) | 1.498(6) | C(30)-C(29)-C(28) | 113.8(5) |

---

**Table S10:** Selected torsion angles (degrees) for *N*-lauroyl-*O*-palmitoylethanolamine (N12-O16).

---

|       |       |       |       |         |
|-------|-------|-------|-------|---------|
| C(1)  | C(2)  | C(3)  | C(4)  | -179.17 |
| C(2)  | C(3)  | C(4)  | C(5)  | -178.99 |
| C(3)  | C(4)  | C(5)  | C(6)  | 179.87  |
| C(4)  | C(5)  | C(6)  | C(7)  | 179.55  |
| C(5)  | C(6)  | C(7)  | C(8)  | 178.68  |
| C(6)  | C(7)  | C(8)  | C(9)  | 178.77  |
| C(7)  | C(8)  | C(9)  | C(10) | 177.53  |
| C(8)  | C(9)  | C(10) | C(11) | -178.84 |
| C(9)  | C(10) | C(11) | C(12) | -68.61  |
| C(10) | C(11) | C(12) | O(1)  | -51.85  |
| C(10) | C(11) | C(12) | N(1)  | 127.85  |
| O(1)  | C(12) | N(1)  | C(13) | 0.76    |
| C(11) | C(12) | N(1)  | C(13) | -178.94 |
| C(14) | C(13) | N(1)  | C(12) | -87.35  |
| N(1)  | C(13) | C(14) | O(2)  | 175.79  |
| C(13) | C(14) | O(2)  | C(15) | 123.29  |
| O(3)  | C(15) | O(2)  | C(14) | -1.38   |
| C(16) | C(15) | O(2)  | C(14) | 176.36  |
| O(2)  | C(15) | C(16) | C(17) | -174.52 |
| O(3)  | C(15) | C(16) | C(17) | 3.13    |
| C(15) | C(16) | C(17) | C(18) | -176.99 |
| C(16) | C(17) | C(18) | C(19) | 179.70  |
| C(17) | C(18) | C(19) | C(20) | -178.75 |
| C(18) | C(19) | C(20) | C(21) | -179.50 |
| C(19) | C(20) | C(21) | C(22) | -179.61 |
| C(20) | C(21) | C(22) | C(23) | -178.97 |
| C(21) | C(22) | C(23) | C(24) | -179.84 |
| C(22) | C(23) | C(24) | C(25) | -179.94 |
| C(23) | C(24) | C(25) | C(26) | 179.68  |

|                         |         |
|-------------------------|---------|
| C(24) C(25) C(26) C(27) | -179.71 |
| C(25) C(26) C(27) C(28) | -179.66 |
| C(26) C(27) C(28) C(29) | -179.30 |
| C(27) C(28) C(29) C(30) | -179.50 |

---

**Table S11:** Fractional atomic coordinates ( $\times 10^4$ ) and equivalent isotropic displacement parameters ( $\text{\AA}^2 \times 10^3$ ) for the *N*-tridecanoyl-*O*-palmitoylethanolamine (N13-O16).  $U(\text{eq})$  is defined as one third of the trace of the orthogonalized  $U_{ij}$  tensor [ $U(\text{eq}) = \frac{1}{3} \sum_i \sum_j U_{ij} a_i^* a_j^* a_i a_j \cos(a_i, a_j)$ ].

| Atom  | x       | y       | z        | U(eq) |
|-------|---------|---------|----------|-------|
| C(1)  | 100(1)  | 7088(9) | 4622(5)  | 39(1) |
| C(2)  | 198(1)  | 8215(8) | 4375(4)  | 27(1) |
| C(3)  | 245(1)  | 7015(7) | 2990(4)  | 22(1) |
| C(4)  | 343(1)  | 8131(7) | 2746(4)  | 19(1) |
| C(5)  | 392(1)  | 6916(7) | 1369(3)  | 18(1) |
| C(6)  | 488(1)  | 8096(7) | 1118(3)  | 17(1) |
| C(7)  | 536(1)  | 6883(7) | -263(3)  | 18(1) |
| C(8)  | 633(1)  | 8079(7) | -518(3)  | 17(1) |
| C(9)  | 681(1)  | 6878(7) | -1913(3) | 18(1) |
| C(10) | 779(1)  | 8025(7) | -2175(3) | 18(1) |
| C(11) | 823(1)  | 6878(6) | -3622(3) | 17(1) |
| C(12) | 921(1)  | 8006(7) | -3890(3) | 18(1) |
| C(13) | 991(1)  | 7020(6) | -2691(3) | 16(1) |
| C(14) | 1113(1) | 8245(7) | -836(4)  | 22(1) |
| C(15) | 1198(1) | 6990(8) | -1506(4) | 29(1) |
| C(16) | 1333(1) | 7677(7) | 116(4)   | 20(1) |
| C(17) | 1388(1) | 6513(7) | 1433(3)  | 18(1) |
| C(18) | 1483(1) | 7893(7) | 1682(3)  | 18(1) |
| C(19) | 1535(1) | 6720(7) | 3072(3)  | 17(1) |
| C(20) | 1630(1) | 8024(6) | 3349(3)  | 17(1) |
| C(21) | 1681(1) | 6875(6) | 4755(3)  | 16(1) |
| C(22) | 1777(1) | 8099(7) | 5069(3)  | 17(1) |
| C(23) | 1826(1) | 6906(6) | 6476(3)  | 17(1) |
| C(24) | 1923(1) | 8118(6) | 6795(3)  | 16(1) |
| C(25) | 1971(1) | 6899(6) | 8199(3)  | 14(1) |

|       |         |         |          |       |
|-------|---------|---------|----------|-------|
| C(26) | 2068(1) | 8106(6) | 8523(3)  | 16(1) |
| C(27) | 2117(1) | 6888(7) | 9925(3)  | 17(1) |
| C(28) | 2214(1) | 8099(7) | 10250(3) | 17(1) |
| C(29) | 2263(1) | 6888(7) | 11655(3) | 17(1) |
| C(30) | 2360(1) | 8077(7) | 11962(4) | 22(1) |
| C(31) | 2407(1) | 6906(7) | 13386(4) | 24(1) |
| N(1)  | 1044(1) | 8936(6) | -2020(3) | 18(1) |
| O(1)  | 998(1)  | 4569(4) | -2378(3) | 21(1) |
| O(2)  | 1260(1) | 6062(6) | -274(3)  | 32(1) |
| O(3)  | 1346(1) | 9792(7) | -501(4)  | 61(1) |

---



**Table S12:** Selected bond distances (Å) and bond angles (degrees) for *N*-tridecanoyl-*O*-palmitoylethanolamine (N13-O16).

| Bond distances (Å) |          | Bond angle (degree) |          |
|--------------------|----------|---------------------|----------|
| C(1)-C(2)          | 1.520(5) | C(3)-C(2)-C(1)      | 113.7(3) |
| C(2)-C(3)          | 1.518(4) | C(2)-C(3)-C(4)      | 113.8(3) |
| C(3)-C(4)          | 1.523(4) | C(5)-C(4)-C(3)      | 114.0(3) |
| C(4)-C(5)          | 1.520(4) | C(4)-C(5)-C(6)      | 113.5(3) |
| C(5)-C(6)          | 1.521(4) | C(7)-C(6)-C(5)      | 113.3(3) |
| C(6)-C(7)          | 1.520(4) | C(6)-C(7)-C(8)      | 113.2(3) |
| C(7)-C(8)          | 1.529(4) | C(7)-C(8)-C(9)      | 113.4(3) |
| C(8)-C(9)          | 1.529(4) | C(10)-C(9)-C(8)     | 114.1(3) |
| C(9)-C(10)         | 1.526(4) | C(9)-C(10)-C(11)    | 112.6(3) |
| C(10)-C(11)        | 1.531(4) | C(12)-C(11)-C(10)   | 113.0(3) |
| C(11)-C(12)        | 1.527(4) | C(13)-C(12)-C(11)   | 112.4(2) |
| C(12)-C(13)        | 1.520(4) | O(1)-C(13)-N(1)     | 122.7(3) |
| O(1)-C(13)         | 1.230(4) | O(1)-C(13)-C(12)    | 120.8(3) |
| N(1)-C(13)         | 1.331(4) | N(1)-C(13)-C(12)    | 116.5(3) |
| N(1)-C(14)         | 1.457(4) | N(1)-C(14)-C(15)    | 111.5(3) |
| C(14)-C(15)        | 1.498(5) | O(2)-C(15)-C(14)    | 109.3(3) |
| O(2)-C(16)         | 1.342(4) | O(3)-C(16)-O(2)     | 122.0(3) |
| O(2)-C(15)         | 1.454(4) | O(3)-C(16)-C(17)    | 126.3(3) |
| O(3)-C(16)         | 1.181(4) | O(2)-C(16)-C(17)    | 111.7(3) |
| C(16)-C(17)        | 1.498(4) | C(16)-C(17)-C(18)   | 113.5(3) |
| C(17)-C(18)        | 1.523(4) | C(17)-C(18)-C(19)   | 111.7(3) |
| C(18)-C(19)        | 1.527(4) | C(20)-C(19)-C(18)   | 113.3(3) |
| C(19)-C(20)        | 1.523(4) | C(21)-C(20)-C(19)   | 112.7(2) |
| C(20)-C(21)        | 1.519(4) | C(20)-C(21)-C(22)   | 114.6(3) |
| C(21)-C(22)        | 1.523(4) | C(23)-C(22)-C(21)   | 113.4(3) |
| C(22)-C(23)        | 1.518(4) | C(22)-C(23)-C(24)   | 113.6(3) |
| C(23)-C(24)        | 1.531(4) | C(25)-C(24)-C(23)   | 113.4(2) |
| C(24)-C(25)        | 1.521(4) | C(24)-C(25)-C(26)   | 113.6(2) |

|             |          |                   |          |
|-------------|----------|-------------------|----------|
| C(25)-C(26) | 1.531(4) | C(27)-C(26)-C(25) | 113.7(2) |
| C(26)-C(27) | 1.520(4) | C(26)-C(27)-C(28) | 113.7(3) |
| C(27)-C(28) | 1.529(4) | C(29)-C(28)-C(27) | 113.7(3) |
| C(28)-C(29) | 1.521(4) | C(28)-C(29)-C(30) | 113.5(3) |
| C(29)-C(30) | 1.524(4) | C(31)-C(30)-C(29) | 113.2(3) |
| C(30)-C(31) | 1.517(4) |                   |          |

---

**Table S13:** Selected torsion angles (degrees) for *N*-tridecanoyl-*O*-palmitoylethanolamine (N13-O16).

---

|                         |         |
|-------------------------|---------|
| C(1) C(2) C(3) C(4)     | -179.67 |
| C(2) C(3) C(4) C(5)     | 179.46  |
| C(3) C(4) C(5) C(6)     | 178.62  |
| C(4) C(5) C(6) C(7)     | -179.81 |
| C(5) C(6) C(7) C(8)     | 179.80  |
| C(6) C(7) C(8) C(9)     | -179.54 |
| C(7) C(8) C(9) C(10)    | -179.32 |
| C(8) C(9) C(10) C(11)   | -177.31 |
| C(9) C(10) C(11) C(12)  | -179.79 |
| C(10) C(11) C(12) C(13) | 67.84   |
| C(11) C(12) C(13) O(1)  | 50.37   |
| C(11) C(12) C(13) N(1)  | -129.94 |
| N(1) C(14) C(15) O(2)   | -173.74 |
| C(16) O(2) C(15) C(14)  | -99.76  |
| C(15) O(2) C(16) O(3)   | 0.48    |
| C(15) O(2) C(16) C(17)  | 177.86  |
| C(14) N(1) C(13) O(1)   | -1.34   |
| C(14) N(1) C(13) C(12)  | 178.97  |
| C(13) N(1) C(14) C(15)  | 76.32   |
| O(2) C(16) C(17) C(18)  | 166.66  |
| O(3) C(16) C(17) C(18)  | -16.10  |
| C(16) C(17) C(18) C(19) | 177.74  |
| C(17) C(18) C(19) C(20) | 179.31  |
| C(18) C(19) C(20) C(21) | 178.85  |
| C(19) C(20) C(21) C(22) | 179.42  |
| C(20) C(21) C(22) C(23) | -179.79 |
| C(21) C(22) C(23) C(24) | 179.75  |
| C(22) C(23) C(24) C(25) | -179.58 |

|                         |         |
|-------------------------|---------|
| C(23) C(24) C(25) C(26) | -180.00 |
| C(24) C(25) C(26) C(27) | -179.95 |
| C(25) C(26) C(27) C(28) | -179.87 |
| C(26) C(27) C(28) C(29) | 179.85  |
| C(27) C(28) C(29) C(30) | 179.26  |
| C(28) C(29) C(30) C(31) | 178.69  |

---

**Table S14:** Fractional atomic coordinates ( $\times 10^4$ ) and equivalent isotropic displacement parameters ( $\text{\AA}^2 \times 10^3$ ) for the *N*-myristoyl-*O*-palmitoylethanolamine (N14-O16).  $U(\text{eq})$  is defined as one third of the trace of the orthogonalized  $U_{ij}$  tensor [ $U(\text{eq}) = \frac{1}{3} \sum_i \sum_j U_{ij} a_i^* a_j^* a_i a_j \cos(a_i, a_j)$ ].

| Atom  | x        | y       | z       | U(eq) |
|-------|----------|---------|---------|-------|
| C(1)  | 7644(3)  | 6915(5) | 5701(1) | 27(1) |
| C(2)  | 6233(3)  | 8096(5) | 5793(1) | 20(1) |
| C(3)  | 5945(3)  | 6886(5) | 5984(1) | 17(1) |
| C(4)  | 4562(3)  | 8102(4) | 6080(1) | 16(1) |
| C(5)  | 4275(3)  | 6882(4) | 6270(1) | 16(1) |
| C(6)  | 2886(3)  | 8096(4) | 6366(1) | 15(1) |
| C(7)  | 2595(3)  | 6878(4) | 6555(1) | 15(1) |
| C(8)  | 1203(3)  | 8109(5) | 6651(1) | 15(1) |
| C(9)  | 906(3)   | 6891(5) | 6841(1) | 16(1) |
| C(10) | -490(3)  | 8127(4) | 6936(1) | 15(1) |
| C(11) | -799(3)  | 6964(4) | 7127(1) | 15(1) |
| C(12) | -2251(3) | 8138(5) | 7214(1) | 15(1) |
| C(13) | -2565(3) | 7017(4) | 7405(1) | 14(1) |
| C(14) | -1397(2) | 8002(4) | 7545(1) | 11(1) |
| C(15) | 433(3)   | 6732(5) | 7784(1) | 21(1) |
| C(16) | -261(3)  | 7978(6) | 7954(1) | 29(1) |
| C(17) | 1310(3)  | 7319(5) | 8218(1) | 20(1) |
| C(18) | 2606(3)  | 8511(5) | 8326(1) | 15(1) |
| C(19) | 2826(3)  | 7113(5) | 8512(1) | 19(1) |
| C(20) | 4204(3)  | 8298(5) | 8615(1) | 16(1) |
| C(21) | 4452(3)  | 6988(5) | 8802(1) | 16(1) |
| C(22) | 5846(3)  | 8144(5) | 8901(1) | 16(1) |
| C(23) | 6120(3)  | 6897(5) | 9091(1) | 15(1) |
| C(24) | 7517(3)  | 8091(5) | 9187(1) | 15(1) |
| C(25) | 7795(3)  | 6873(5) | 9379(1) | 16(1) |

|       |          |          |          |       |
|-------|----------|----------|----------|-------|
| C(26) | 9186(3)  | 8097(5)  | 9473(1)  | 16(1) |
| C(27) | 9471(3)  | 6895(5)  | 9665(1)  | 15(1) |
| C(28) | 10856(3) | 8107(5)  | 9760(1)  | 15(1) |
| C(29) | 11139(3) | 6902(5)  | 9951(1)  | 15(1) |
| C(30) | 12535(3) | 8107(5)  | 10048(1) | 17(1) |
| C(31) | 12801(3) | 6909(5)  | 10238(1) | 20(1) |
| C(32) | 14223(3) | 8096(5)  | 10332(1) | 23(1) |
| N(1)  | -734(2)  | 6073(4)  | 7649(1)  | 15(1) |
| O(1)  | -1082(2) | 10442(3) | 7561(1)  | 22(1) |
| O(2)  | 952(2)   | 8907(4)  | 8075(1)  | 34(1) |
| O(3)  | 674(3)   | 5228(6)  | 8248(1)  | 66(1) |

---

**Table S15:** Selected bond distances (Å) and bond angles (degrees) for *N*-myristoyl-*O*-palmitoylethanolamine (N14-O16).

| Bond distances (Å) |          | Bond angle (degree) |            |
|--------------------|----------|---------------------|------------|
| C(1)-C(2)          | 1.520(3) | C(1)-C(2)-C(3)      | 112.7(2)   |
| C(3)-C(2)          | 1.529(3) | C(4)-C(3)-C(2)      | 113.4(2)   |
| C(3)-C(4)          | 1.520(3) | C(3)-C(4)-C(5)      | 113.29(19) |
| C(5)-C(4)          | 1.526(3) | C(6)-C(5)-C(4)      | 113.36(19) |
| C(5)-C(6)          | 1.525(3) | C(7)-C(6)-C(5)      | 113.47(19) |
| C(7)-C(6)          | 1.519(3) | C(6)-C(7)-C(8)      | 113.05(19) |
| C(7)-C(8)          | 1.528(3) | C(9)-C(8)-C(7)      | 113.24(19) |
| C(9)-C(8)          | 1.527(3) | C(8)-C(9)-C(10)     | 113.07(19) |
| C(9)-C(10)         | 1.530(3) | C(11)-C(10)-C(9)    | 114.00(19) |
| C(10)-C(11)        | 1.525(3) | C(10)-C(11)-C(12)   | 112.58(19) |
| C(11)-C(12)        | 1.533(3) | C(13)-C(12)-C(11)   | 113.19(19) |
| C(12)-C(13)        | 1.518(3) | C(12)-C(13)-C(14)   | 111.96(18) |
| C(13)-C(14)        | 1.520(3) | O(1)-C(14)-N(1)     | 122.0(2)   |
| O(1)-C(14)         | 1.228(3) | O(1)-C(14)-C(13)    | 121.41(19) |
| N(1)-C(14)         | 1.339(3) | N(1)-C(14)-C(13)    | 116.59(19) |
| C(15)-N(1)         | 1.458(3) | N(1)-C(15)-C(16)    | 111.15(19) |
| C(16)-C(15)        | 1.506(3) | O(2)-C(16)-C(15)    | 108.9(2)   |
| O(2)-C(16)         | 1.449(3) | C(17)-O(2)-C(16)    | 117.5(2)   |
| C(17)-O(2)         | 1.337(3) | O(2)-C(17)-C(18)    | 111.2(2)   |
| O(3)-C(17)         | 1.182(3) | O(3)-C(17)-O(2)     | 121.9(2)   |
| C(18)-C(17)        | 1.499(3) | O(3)-C(17)-C(18)    | 126.8(2)   |
| C(19)-C(18)        | 1.527(3) | C(17)-C(18)-C(19)   | 112.7(2)   |
| C(20)-C(19)        | 1.534(3) | C(18)-C(19)-C(20)   | 111.3(2)   |
| C(21)-C(20)        | 1.520(3) | C(21)-C(20)-C(19)   | 113.03(19) |
| C(21)-C(22)        | 1.524(3) | C(20)-C(21)-C(22)   | 112.3(2)   |
| C(23)-C(22)        | 1.532(3) | C(21)-C(22)-C(23)   | 113.7(2)   |
| C(23)-C(24)        | 1.526(3) | C(24)-C(23)-C(22)   | 112.9(2)   |
| C(25)-C(24)        | 1.530(3) | C(23)-C(24)-C(25)   | 113.3(2)   |

|             |          |                   |            |
|-------------|----------|-------------------|------------|
| C(25)-C(26) | 1.524(3) | C(26)-C(25)-C(24) | 112.7(2)   |
| C(26)-C(27) | 1.530(3) | C(25)-C(26)-C(27) | 113.03(19) |
| C(27)-C(28) | 1.518(3) | C(28)-C(27)-C(26) | 113.27(19) |
| C(29)-C(28) | 1.530(3) | C(27)-C(28)-C(29) | 113.2(2)   |
| C(29)-C(30) | 1.530(3) | C(30)-C(29)-C(28) | 113.6(2)   |
| C(31)-C(30) | 1.519(3) | C(31)-C(30)-C(29) | 113.2(2)   |
| C(31)-C(32) | 1.536(3) | C(30)-C(31)-C(32) | 112.7(2)   |

---



**Table S16:** Selected torsion angles (degrees) for *N*-myristoyl-*O*-palmitoylethanolamine (N14-O16).

---

|                         |         |
|-------------------------|---------|
| C(1) C(2) C(3) C(4)     | -178.41 |
| C(2) C(3) C(4) C(5)     | -179.78 |
| C(3) C(4) C(5) C(6)     | 179.90  |
| C(4) C(5) C(6) C(7)     | -179.81 |
| C(5) C(6) C(7) C(8)     | -179.94 |
| C(6) C(7) C(8) C(9)     | 179.97  |
| C(7) C(8) C(9) C(10)    | 179.92  |
| C(8) C(9) C(10) C(11)   | 179.33  |
| C(9) C(10) C(11) C(12)  | 177.02  |
| C(10) C(11) C(12) C(13) | 179.50  |
| C(11) C(12) C(13) C(14) | -68.26  |
| C(12) C(13) C(14) O(1)  | -51.00  |
| C(12) C(13) C(14) N(1)  | 129.05  |
| O(1) C(14) N(1) C(15)   | 1.59    |
| C(13) C(14) N(1) C(15)  | -178.47 |
| C(16) C(15) N(1) C(14)  | -76.24  |
| N(1) C(15) C(16) O(2)   | 172.91  |
| C(16) O(2) C(17) O(3)   | -0.20   |
| C(16) O(2) C(17) C(18)  | -178.50 |
| C(17) O(2) C(16) C(15)  | 101.14  |
| O(2) C(17) C(18) C(19)  | -167.66 |
| O(3) C(17) C(18) C(19)  | 14.14   |
| C(17) C(18) C(19) C(20) | -177.49 |
| C(18) C(19) C(20) C(21) | -179.23 |
| C(19) C(20) C(21) C(22) | -178.69 |
| C(20) C(21) C(22) C(23) | -179.23 |
| C(21) C(22) C(23) C(24) | 179.78  |
| C(22) C(23) C(24) C(25) | -179.60 |
| C(23) C(24) C(25) C(26) | 179.63  |

|                         |         |
|-------------------------|---------|
| C(24) C(25) C(26) C(27) | -179.89 |
| C(25) C(26) C(27) C(28) | -179.98 |
| C(26) C(27) C(28) C(29) | -180.00 |
| C(27) C(28) C(29) C(30) | -179.89 |
| C(28) C(29) C(30) C(31) | -179.70 |
| C(29) C(30) C(31) C(32) | -178.90 |

---

**Table S17:** Fractional atomic coordinates ( $\times 10^4$ ) and equivalent isotropic displacement parameters ( $\text{\AA}^2 \times 10^3$ ) for the *N*-lauroyl-*O*-pentadecanoylethanolamine (N12-O15).  $U(\text{eq})$  is defined as one third of the trace of the orthogonalized  $U_{ij}$  tensor [ $U(\text{eq}) = \frac{1}{3} \sum_i \sum_j U_{ij} a_i^* a_j^* a_i a_j \cos(a_i, a_j)$ ].

| Atom  | x       | y       | z        | U(eq) |
|-------|---------|---------|----------|-------|
| C(1)  | 2401(1) | 3089(7) | 3395(4)  | 29(1) |
| C(2)  | 2351(1) | 1918(7) | 1962(4)  | 26(1) |
| C(3)  | 2248(1) | 3113(6) | 1660(4)  | 22(1) |
| C(4)  | 2196(1) | 1906(6) | 242(4)   | 22(1) |
| C(5)  | 2094(1) | 3112(6) | -66(4)   | 20(1) |
| C(6)  | 2042(1) | 1895(6) | -1465(4) | 22(1) |
| C(7)  | 1940(1) | 3101(6) | -1800(4) | 22(1) |
| C(8)  | 1888(1) | 1890(6) | -3219(4) | 22(1) |
| C(9)  | 1785(1) | 3028(6) | -3534(4) | 21(1) |
| C(10) | 1739(1) | 1870(6) | -5001(4) | 22(1) |
| C(11) | 1635(1) | 2999(6) | -5346(4) | 21(1) |
| C(12) | 1560(1) | 2022(6) | -4185(3) | 20(1) |
| C(13) | 1431(1) | 3258(6) | -2402(4) | 26(1) |
| C(14) | 1339(1) | 1978(8) | -3120(4) | 34(1) |
| C(15) | 1197(1) | 2687(7) | -1581(4) | 24(1) |
| C(16) | 1138(1) | 1517(6) | -292(4)  | 24(1) |
| C(17) | 1038(1) | 2893(6) | -100(4)  | 24(1) |
| C(18) | 982(1)  | 1730(6) | 1260(4)  | 24(1) |
| C(19) | 881(1)  | 3026(6) | 1477(4)  | 24(1) |
| C(20) | 828(1)  | 1871(6) | 2856(4)  | 23(1) |
| C(21) | 726(1)  | 3110(6) | 3104(4)  | 23(1) |
| C(22) | 673(1)  | 1908(6) | 4470(4)  | 25(1) |
| C(23) | 571(1)  | 3123(6) | 4728(4)  | 23(1) |

|       |         |         |          |       |
|-------|---------|---------|----------|-------|
| C(24) | 519(1)  | 1922(6) | 6107(4)  | 22(1) |
| C(25) | 416(1)  | 3107(6) | 6359(4)  | 25(1) |
| C(26) | 364(1)  | 1879(6) | 7736(4)  | 24(1) |
| C(27) | 261(1)  | 3003(6) | 7978(4)  | 27(1) |
| C(28) | 211(1)  | 1783(7) | 9355(4)  | 32(1) |
| C(29) | 107(1)  | 2912(9) | 9615(5)  | 47(1) |
| N(1)  | 1504(1) | 3931(5) | -3546(3) | 23(1) |
| O(1)  | 1552(1) | -439(4) | -3872(3) | 26(1) |
| O(2)  | 1275(1) | 1076(5) | -1922(3) | 38(1) |
| O(3)  | 1183(1) | 4794(7) | -2229(4) | 67(1) |

---

**Table S18:** Selected bond distances (Å) and bond angles (degrees) for *N*-lauroyl-*O*-pentadecanoylethanolamine (N12-O15).

| Bond distances (Å) |          | Bond angle (degree) |          |
|--------------------|----------|---------------------|----------|
| C(2)-C(1)          | 1.521(4) | C(1)-C(2)-C(3)      | 112.7(3) |
| C(2)-C(3)          | 1.528(4) | C(4)-C(3)-C(2)      | 113.1(3) |
| C(4)-C(3)          | 1.527(4) | C(5)-C(4)-C(3)      | 113.1(3) |
| C(4)-C(5)          | 1.527(4) | C(6)-C(5)-C(4)      | 113.1(3) |
| C(6)-C(5)          | 1.516(4) | C(5)-C(6)-C(7)      | 113.8(3) |
| C(6)-C(7)          | 1.527(4) | C(8)-C(7)-C(6)      | 113.5(3) |
| C(8)-C(7)          | 1.525(4) | C(9)-C(8)-C(7)      | 113.8(3) |
| C(8)-C(9)          | 1.521(4) | C(8)-C(9)-C(10)     | 112.1(2) |
| C(10)-C(9)         | 1.524(4) | C(9)-C(10)-C(11)    | 113.0(2) |
| C(10)-C(11)        | 1.534(4) | C(12)-C(11)-C(10)   | 112.0(2) |
| C(11)-C(12)        | 1.523(4) | O(1)-C(12)-C(11)    | 120.9(3) |
| O(1)-C(12)         | 1.237(4) | N(1)-C(12)-C(11)    | 117.0(3) |
| N(1)-C(12)         | 1.335(4) | O(1)-C(12)-N(1)     | 122.1(3) |
| N(1)-C(13)         | 1.456(4) | O(2)-C(14)-C(13)    | 109.2(3) |
| C(13)-C(14)        | 1.512(5) | N(1)-C(13)-C(14)    | 111.7(3) |
| O(2)-C(14)         | 1.446(4) | C(15)-O(2)-C(14)    | 117.8(3) |
| O(2)-C(15)         | 1.347(4) | O(3)-C(15)-O(2)     | 121.3(3) |
| O(3)-C(15)         | 1.188(4) | C(15)-C(16)-C(17)   | 113.8(3) |
| C(16)-C(15)        | 1.509(4) | C(16)-C(17)-C(18)   | 112.2(3) |
| C(16)-C(17)        | 1.521(4) | C(19)-C(18)-C(17)   | 113.8(3) |
| C(18)-C(17)        | 1.532(4) | C(18)-C(19)-C(20)   | 112.9(3) |
| C(18)-C(19)        | 1.520(4) | (21)-C(20)-C(19)    | 114.4(3) |
| C(20)-C(19)        | 1.529(4) | C(22)-C(21)-C(20)   | 113.5(3) |
| C(20)-C(21)        | 1.527(4) | C(21)-C(22)-C(23)   | 114.1(3) |
| C(22)-C(21)        | 1.521(4) | C(24)-C(23)-C(22)   | 113.7(3) |
| C(22)-C(23)        | 1.528(4) | C(23)-C(24)-C(25)   | 113.9(3) |
| C(24)-C(23)        | 1.526(4) | C(26)-C(25)-C(24)   | 113.5(3) |

|             |          |                   |          |
|-------------|----------|-------------------|----------|
| C(24)-C(25) | 1.527(4) | C(27)-C(26)-C(25) | 113.9(3) |
| C(25)-C(26) | 1.527(4) | C(28)-C(27)-C(26) | 113.4(3) |
| C(26)-C(27) | 1.522(4) | C(27)-C(28)-C(29) | 113.8(3) |
| C(27)-C(28) | 1.515(5) |                   |          |
| C(28)-C(29) | 1.526(5) |                   |          |

---

**Table S19:** Selected torsion angles (degrees) for *N*-lauroyl-*O*-pentadecanoyl ethanolamine (N12-O15).

---

|       |       |       |       |         |
|-------|-------|-------|-------|---------|
| C(1)  | C(2)  | C(3)  | C(4)  | -178.79 |
| C(2)  | C(3)  | C(4)  | C(5)  | -179.65 |
| C(3)  | C(4)  | C(5)  | C(6)  | -179.49 |
| C(4)  | C(5)  | C(6)  | C(7)  | -179.38 |
| C(5)  | C(6)  | C(7)  | C(8)  | 179.37  |
| C(6)  | C(7)  | C(8)  | C(9)  | 178.44  |
| C(7)  | C(8)  | C(9)  | C(10) | 177.25  |
| C(8)  | C(9)  | C(10) | C(11) | -179.74 |
| C(9)  | C(10) | C(11) | C(12) | -67.70  |
| C(10) | C(11) | C(12) | O(1)  | -50.91  |
| C(10) | C(11) | C(12) | N(1)  | 129.77  |
| N(1)  | C(13) | C(14) | O(2)  | 173.61  |
| C(15) | O(2)  | C(14) | C(13) | 100.19  |
| C(14) | O(2)  | C(15) | O(3)  | -0.69   |
| C(14) | O(2)  | C(15) | C(16) | -178.82 |
| C(13) | N(1)  | C(12) | O(1)  | 1.75    |
| C(13) | N(1)  | C(12) | C(11) | -178.94 |
| C(12) | N(1)  | C(13) | C(14) | -76.26  |
| O(2)  | C(15) | C(16) | C(17) | -167.05 |
| O(3)  | C(15) | C(16) | C(17) | 14.95   |
| C(15) | C(16) | C(17) | C(18) | -177.64 |
| C(16) | C(17) | C(18) | C(19) | -179.19 |
| C(17) | C(18) | C(19) | C(20) | -178.96 |
| C(18) | C(19) | C(20) | C(21) | -179.55 |
| C(19) | C(20) | C(21) | C(22) | 179.30  |
| C(20) | C(21) | C(22) | C(23) | -179.80 |
| C(21) | C(22) | C(23) | C(24) | -179.56 |
| C(22) | C(23) | C(24) | C(25) | -179.34 |
| C(23) | C(24) | C(25) | C(26) | 179.66  |

|                         |         |
|-------------------------|---------|
| C(24) C(25) C(26) C(27) | -178.80 |
| C(25) C(26) C(27) C(28) | -179.57 |
| C(26) C(27) C(28) C(29) | 179.57  |

---



**Table S20:** Fractional atomic coordinates ( $\times 10^4$ ) and equivalent isotropic displacement parameters ( $\text{\AA}^2 \times 10^3$ ) for the *N*-myristoyl-*O*-pentadecanoylethanolamine (N14-O15).  $U(\text{eq})$  is defined as one third of the trace of the orthogonalized  $U_{ij}$  tensor [ $U(\text{eq}) = \frac{1}{3} \sum_i \sum_j U_{ij} a_i^* a_j^* a_i a_j \cos(a_i, a_j)$ ].

| Atom  | x       | y       | z        | U(eq) |
|-------|---------|---------|----------|-------|
| C(1)  | 2407(1) | 6907(5) | 1536(2)  | 27(1) |
| C(2)  | 2360(1) | 8084(4) | 2933(2)  | 23(1) |
| C(3)  | 2263(1) | 6891(4) | 3171(2)  | 20(1) |
| C(4)  | 2214(1) | 8096(4) | 4545(2)  | 19(1) |
| C(5)  | 2117(1) | 6884(4) | 4788(2)  | 19(1) |
| C(6)  | 2068(1) | 8099(4) | 6162(2)  | 19(1) |
| C(7)  | 1972(1) | 6887(4) | 6411(2)  | 19(1) |
| C(8)  | 1923(1) | 8103(4) | 7787(2)  | 18(1) |
| C(9)  | 1827(1) | 6902(4) | 8038(2)  | 18(1) |
| C(10) | 1779(1) | 8117(4) | 9424(2)  | 19(1) |
| C(11) | 1682(1) | 6973(4) | 9680(2)  | 18(1) |
| C(12) | 1637(1) | 8131(4) | 11114(2) | 18(1) |
| C(13) | 1540(1) | 6990(4) | 11395(2) | 18(1) |
| C(14) | 1470(1) | 7979(4) | 10196(2) | 17(1) |
| C(15) | 1348(1) | 6747(4) | 8322(2)  | 23(1) |
| C(16) | 1262(1) | 8031(5) | 8996(3)  | 29(1) |
| C(17) | 1128(1) | 7317(4) | 7365(2)  | 23(1) |
| C(18) | 1072(1) | 8493(4) | 6045(2)  | 21(1) |
| C(19) | 977(1)  | 7101(4) | 5789(2)  | 21(1) |
| C(20) | 925(1)  | 8279(4) | 4399(2)  | 20(1) |
| C(21) | 830(1)  | 6972(4) | 4104(2)  | 20(1) |
| C(22) | 779(1)  | 8136(4) | 2694(2)  | 19(1) |
| C(23) | 683(1)  | 6888(4) | 2381(2)  | 19(1) |

|       |         |          |          |       |
|-------|---------|----------|----------|-------|
| C(24) | 634(1)  | 8085(4)  | 966(2)   | 19(1) |
| C(25) | 537(1)  | 6868(4)  | 646(2)   | 20(1) |
| C(26) | 488(1)  | 8087(4)  | -763(2)  | 19(1) |
| C(27) | 392(1)  | 6891(4)  | -1086(2) | 20(1) |
| C(28) | 343(1)  | 8133(4)  | -2490(2) | 21(1) |
| C(29) | 245(1)  | 6991(4)  | -2811(2) | 23(1) |
| C(30) | 197(1)  | 8225(5)  | -4225(3) | 29(1) |
| C(31) | 101(1)  | 7087(6)  | -4547(3) | 39(1) |
| N(1)  | 1416(1) | 6070(3)  | 9516(2)  | 20(1) |
| O(1)  | 1462(1) | 10442(3) | 9875(2)  | 24(1) |
| O(2)  | 1200(1) | 8943(4)  | 7756(2)  | 33(1) |
| O(3)  | 1114(1) | 5200(5)  | 7975(3)  | 62(1) |

---

**Table S21:** Selected bond distances (Å) and bond angles (degrees) for *N*-myristoyl-*O*-pentadecanoylethanolamine (N14-O15).

| Bond distances (Å) |          | Bond angle (degree) |            |
|--------------------|----------|---------------------|------------|
| C(1)-C(2)          | 1.526(3) | C(1)-C(2)-C(3)      | 113.03(17) |
| C(2)-C(3)          | 1.531(3) | C(4)-C(3)-C(2)      | 113.70(16) |
| C(3)-C(4)          | 1.529(3) | C(3)-C(4)-C(5)      | 113.59(16) |
| C(4)-C(5)          | 1.532(3) | C(6)-C(5)-C(4)      | 113.52(16) |
| C(5)-C(6)          | 1.532(3) | C(5)-C(6)-C(7)      | 113.69(16) |
| C(6)-C(7)          | 1.533(3) | C(8)-C(7)-C(6)      | 113.42(16) |
| C(7)-C(8)          | 1.529(3) | C(7)-C(8)-C(9)      | 113.59(16) |
| C(8)-C(9)          | 1.530(3) | C(8)-C(9)-C(10)     | 113.32(16) |
| C(9)-C(10)         | 1.532(3) | C(11)-C(10)-C(9)    | 114.13(16) |
| C(10)-C(11)        | 1.531(3) | C(12)-C(11)-C(10)   | 112.84(16) |
| C(11)-C(12)        | 1.530(3) | C(11)-C(12)-C(13)   | 113.56(16) |
| C(12)-C(13)        | 1.538(3) | C(14)-C(13)-C(12)   | 111.71(15) |
| C(13)-C(14)        | 1.517(3) | O(1)-C(14)-N(1)     | 121.89(18) |
| N(1)-C(14)         | 1.341(3) | O(1)-C(14)-C(13)    | 121.28(18) |
| O(1)-C(14)         | 1.241(2) | N(1)-C(14)-C(13)    | 116.82(16) |
| N(1)-C(15)         | 1.459(3) | N(1)-C(15)-C(16)    | 111.27(17) |
| O(2)-C(16)         | 1.452(3) | O(2)-C(16)-C(15)    | 108.98(18) |
| O(2)-C(17)         | 1.353(3) | O(3)-C(17)-O(2)     | 122.3(2)   |
| O(3)-C(17)         | 1.182(3) | O(3)-C(17)-C(18)    | 126.1(2)   |
| C(17)-C(18)        | 1.507(3) | O(2)-C(17)-C(18)    | 111.53(18) |
| C(18)-C(19)        | 1.531(3) | C(17)-C(18)-C(19)   | 113.56(17) |
| C(19)-C(20)        | 1.529(3) | C(20)-C(19)-C(18)   | 111.65(16) |
| C(20)-C(21)        | 1.530(3) | C(19)-C(20)-C(21)   | 113.65(16) |
| C(21)-C(22)        | 1.528(3) | C(22)-C(21)-C(20)   | 112.90(16) |
| C(22)-C(23)        | 1.536(3) | C(21)-C(22)-C(23)   | 114.08(16) |
| C(23)-C(24)        | 1.529(3) | C(24)-C(23)-C(22)   | 113.22(16) |
| C(24)-C(25)        | 1.530(3) | C(23)-C(24)-C(25)   | 113.72(16) |

|             |          |                   |            |
|-------------|----------|-------------------|------------|
| C(25)-C(26) | 1.528(3) | C(26)-C(25)-C(24) | 113.39(16) |
| C(26)-C(27) | 1.531(3) | C(25)-C(26)-C(27) | 113.71(16) |
| C(27)-C(28) | 1.526(3) | C(28)-C(27)-C(26) | 113.32(16) |
| C(28)-C(29) | 1.533(3) | C(27)-C(28)-C(29) | 113.91(17) |
| C(29)-C(30) | 1.526(3) | C(30)-C(29)-C(28) | 113.49(18) |
| C(30)-C(31) | 1.524(3) | C(31)-C(30)-C(29) | 113.5(2)   |

---

**Table S22:** Selected torsion angles (degrees) for *N*-myristoyl-*O*-pentadecanoylethanolamine (N14-O15).

---

|                         |         |
|-------------------------|---------|
| C(1) C(2) C(3) C(4)     | -178.70 |
| C(2) C(3) C(4) C(5)     | -179.59 |
| C(3) C(4) C(5) C(6)     | -179.85 |
| C(4) C(5) C(6) C(7)     | -179.91 |
| C(5) C(6) C(7) C(8)     | 179.86  |
| C(6) C(7) C(8) C(9)     | 179.94  |
| C(7) C(8) C(9) C(10)    | 179.65  |
| C(8) C(9) C(10) C(11)   | 179.12  |
| C(9) C(10) C(11) C(12)  | 177.38  |
| C(10) C(11) C(12) C(13) | -179.65 |
| C(11) C(12) C(13) C(14) | -68.55  |
| C(12) C(13) C(14) O(1)  | -50.58  |
| C(12) C(13) C(14) N(1)  | 129.98  |
| N(1) C(15) C(16) O(2)   | 173.64  |
| C(17) O(2) C(16) C(15)  | 99.92   |
| C(16) O(2) C(17) O(3)   | -1.40   |
| C(16) O(2) C(17) C(18)  | -178.75 |
| C(15) N(1) C(14) O(1)   | 1.88    |
| C(15) N(1) C(14) C(13)  | -178.69 |
| C(14) N(1) C(15) C(16)  | -76.44  |
| O(2) C(17) C(18) C(19)  | -166.92 |
| O(3) C(17) C(18) C(19)  | 15.86   |
| C(17) C(18) C(19) C(20) | -177.58 |
| C(18) C(19) C(20) C(21) | -179.48 |
| C(19) C(20) C(21) C(22) | -178.93 |
| C(20) C(21) C(22) C(23) | -179.24 |
| C(21) C(22) C(23) C(24) | 179.90  |
| C(22) C(23) C(24) C(25) | -179.71 |
| C(23) C(24) C(25) C(26) | 179.65  |

|                         |         |
|-------------------------|---------|
| C(24) C(25) C(26) C(27) | -179.68 |
| C(25) C(26) C(27) C(28) | 179.67  |
| C(26) C(27) C(28) C(29) | -179.00 |
| C(27) C(28) C(29) C(30) | -179.43 |
| C(28) C(29) C(30) C(31) | 179.90  |

---

**Table S23:** The unit cell parameters of simulated and experimental (*in brackets*) systems at 100K; unit cell lengths (a, b and c) and angles ( $\alpha$ ,  $\beta$  and  $\gamma$ ) are reported in Å and degrees, respectively.

| <b>System</b><br>(Total atoms in each polymorph) | <b>Supercell size</b> | <b>a, b, c (Å)</b>                                | <b><math>\alpha</math>, <math>\beta</math> and <math>\gamma</math> (degrees)</b> |
|--------------------------------------------------|-----------------------|---------------------------------------------------|----------------------------------------------------------------------------------|
| <b>N14-O16</b><br>(79200)                        | $\alpha$ (10×10×2)    | 9.51, 4.72, 72.95<br><b>(8.78, 4.88, 72.68)</b>   | 90.02, 89.97, 89.92<br><b>(90, 90, 90)</b>                                       |
|                                                  | $\beta$ (1×10×10)     | <b>145.82, 4.76, 8.72</b>                         | <b>93.2, 91.6, 90.1</b>                                                          |
| <b>N13-O16</b><br>(76800)                        | $\alpha$ (10×10×2)    | 7.43, 4.8, 83.0                                   | 91.7, 94.8, 90.1                                                                 |
|                                                  | $\beta$ (1×10×10)     | 144.07, 4.73, 8.65<br><b>(143.4, 4.88, 8.73)</b>  | 89.99, 91.8, 89.97<br><b>(90.0, 91.14, 90.0)</b>                                 |
| <b>N12-O16</b><br>(74400)                        | $\alpha$ (10×10×2)    | 9.51, 4.72, 68.77                                 | 90.03, 89.99, 89.89                                                              |
|                                                  | $\beta$ (2×10×10)     | 68.95, 4.74, 8.67<br><b>(68.97, 4.85, 8.91)</b>   | 89.94, 92.91, 89.97<br><b>(90.0, 92.79, 90.0)</b>                                |
| <b>N14-O15</b><br>(76800)                        | $\alpha$ (10×10×2)    | 8.64, 4.74, 72.10                                 | 90.96, 88.39, 86.86                                                              |
|                                                  | $\beta$ (1×10×10)     | 143.93, 4.74, 8.66<br><b>(144.31, 4.89, 8.75)</b> | 90.05, 91.75, 90.05<br><b>(90.0, 91.44, 90.0)</b>                                |
| <b>N12-O15</b><br>(72000)                        | $\alpha$ (10×10×2)    | 8.60, 4.73, 68.28                                 | 89.09, 90.73, 90.00                                                              |
|                                                  | $\beta$ (1×10×10)     | 135.93, 4.77, 8.63<br><b>(135.24, 4.88, 8.74)</b> | 89.95, 94.71, 90.00<br><b>(90.0, 91.27, 90.0)</b>                                |
| <b>N11-O16</b><br>(72000)                        | $\alpha$ (10×10×2)    | 8.7, 4.8, 67.8                                    | 90.04, 90.03, 89.97                                                              |
|                                                  | $\beta$ (1×10×10)     | 134.00, 4.77, 8.72                                | 90.05, 91.4, 89.98                                                               |

## Supporting Figures:

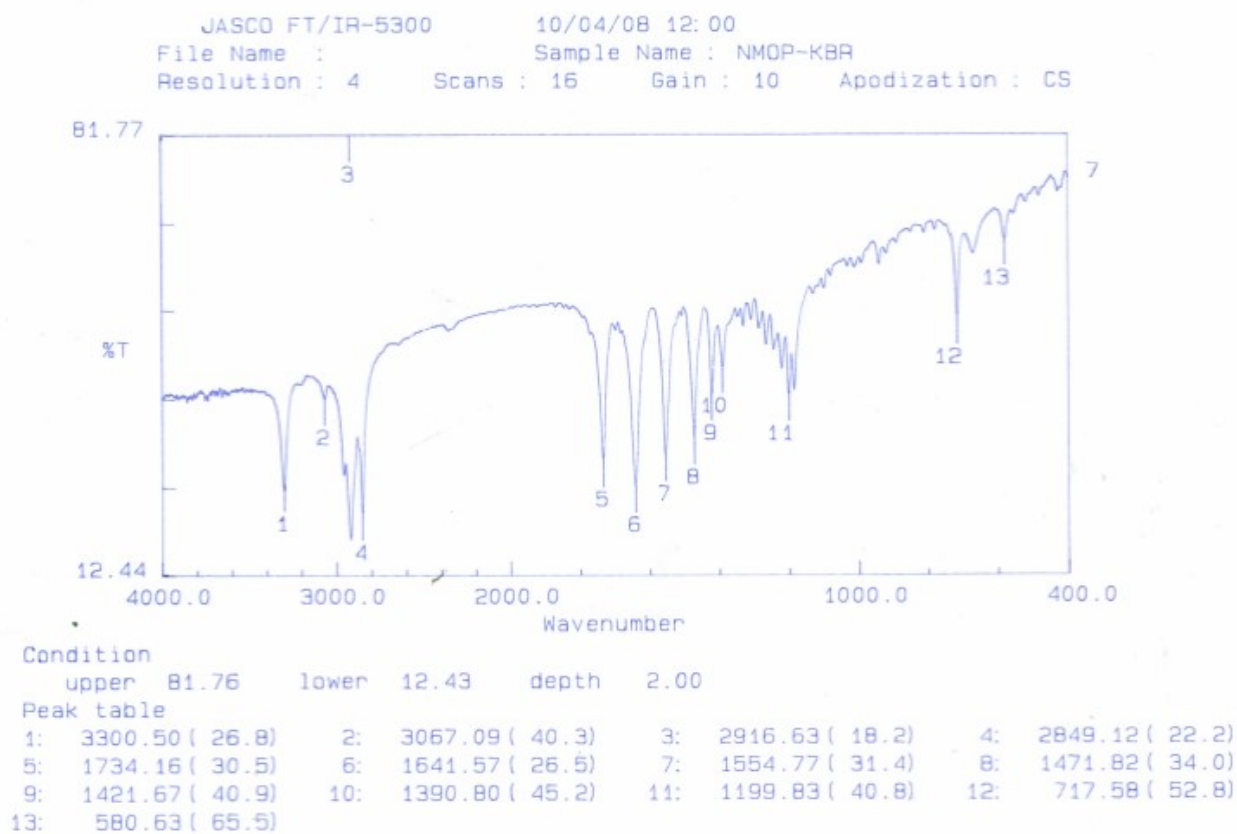

**Fig. S1.** FT-IR spectrum of *N*-myristoyl-*O*-palmitoylethanolamine (N14-O16s) using KBr pellet at room temperature.



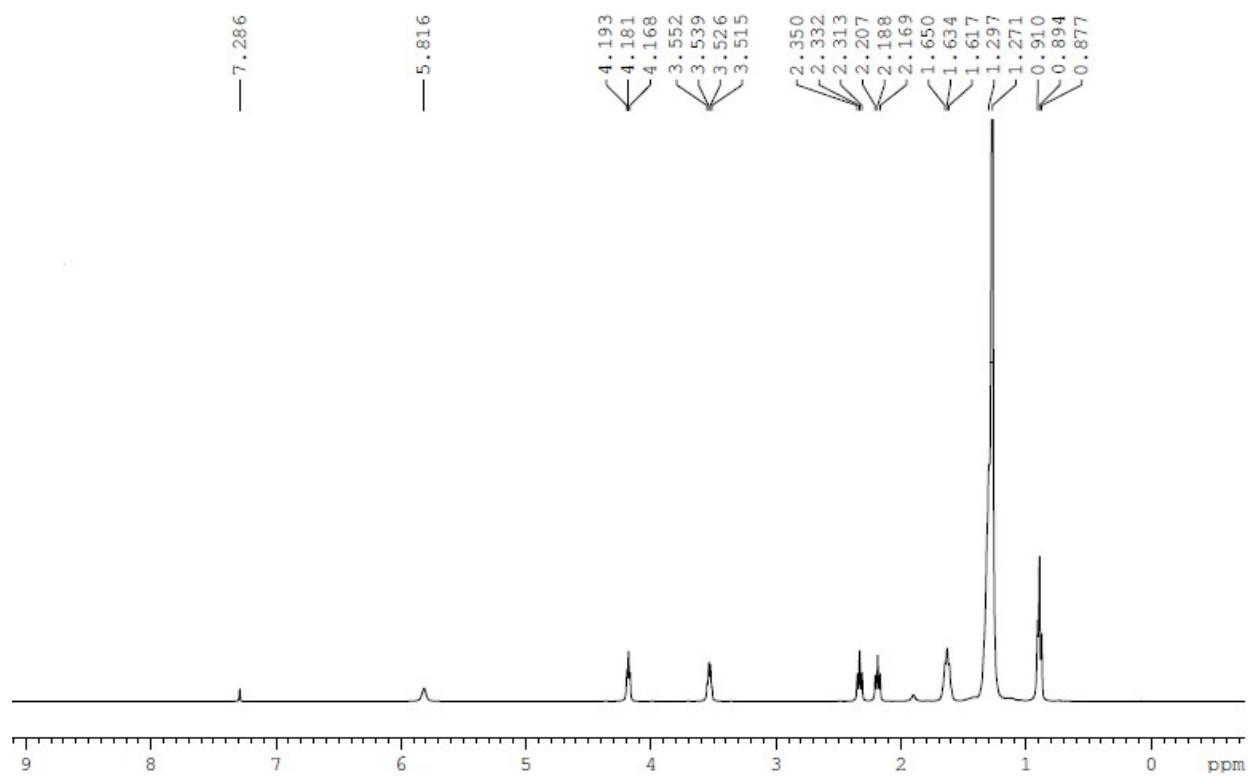

**Fig. S2.**  $^1\text{H-NMR}$  spectrum of *N*-myristoyl-*O*-palmitoylethanolamine (N14-O16s) in  $\text{CDCl}_3$  (solvent) at room temperature.

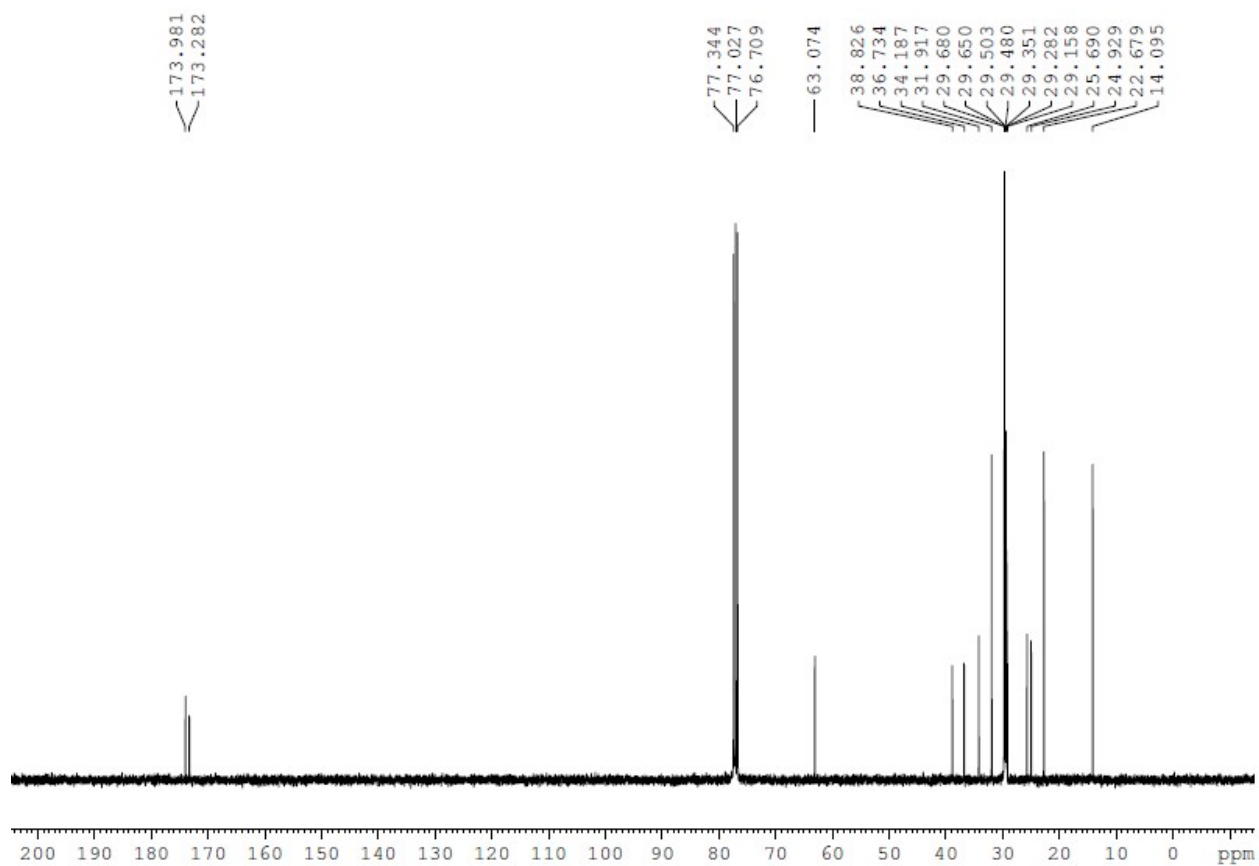

**Fig. S3.**  $^{13}\text{C}$ -NMR spectrum of *N*-myristoyl-*O*-palmitoyl-ethanolamine (N14-O16s) in  $\text{CDCl}_3$  (solvent) at room temperature.

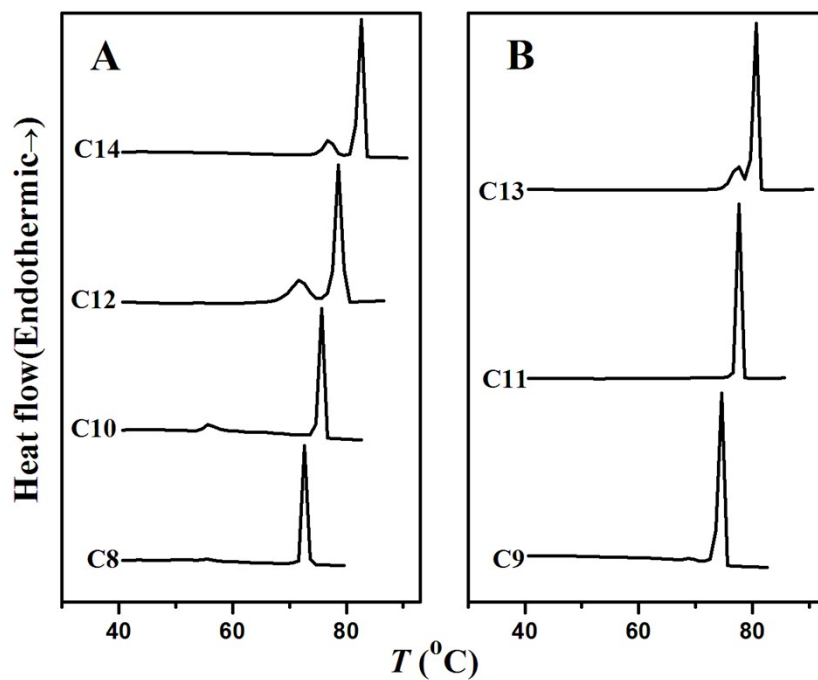

**Fig. S4.** DSC heating thermograms of dry DAEs with fixed *O*-pentadecanoyl chains and different *N*-acyl chains (C=8-14). A) Thermograms of DAEs with even number of C-atoms in the *N*-acyl chains. B) Thermograms of DAEs with odd number of C-atoms in the *N*-acyl chains. The number of C-atoms in the *N*-acyl chain is indicated against each thermogram.

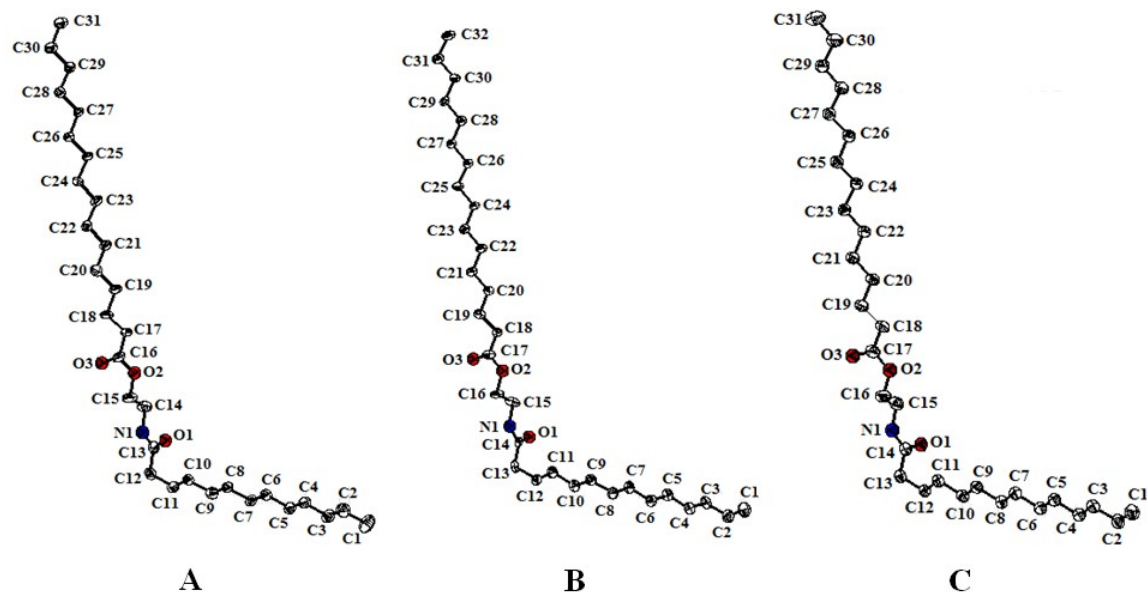

**Fig. S5.** ORTEP diagrams of DAEs. (A) *N*-tridecanoyl-*O*-palmitoylethanolamine (N13-O16), (B) *N*-myristoyl-*O*-palmitoylethanolamine (N14-O16), and (C) *N*-myristoyl-*O*-pentadecanoyl-ethanolamine (N14-O15).

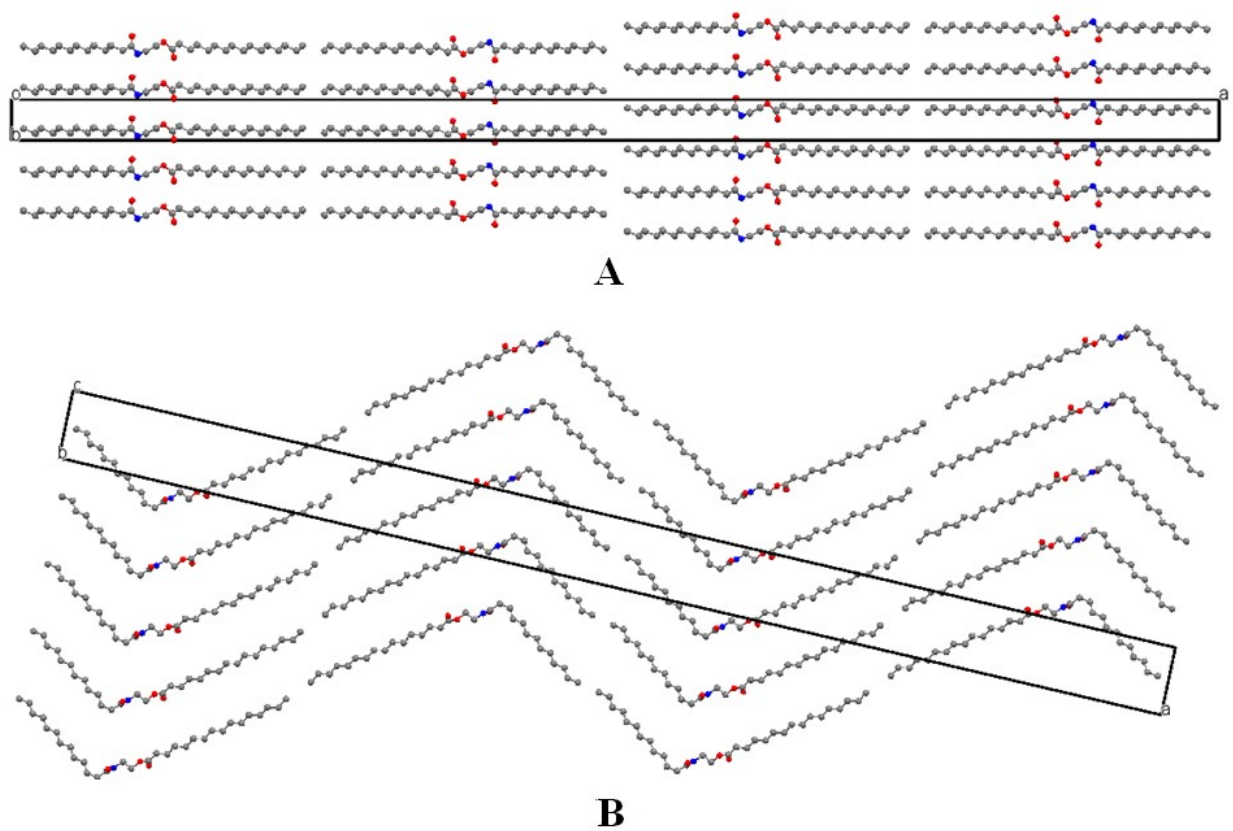

**Fig. S6.** Packing diagrams of N13-O16. (A) A view down the *c*-axis. (B) A view down the *b*-axis. Length of hydrophobic region is also indicated. The crystal lattice of N13-O16 has two different types of hydrophobic regions, one shorter in length and other longer.

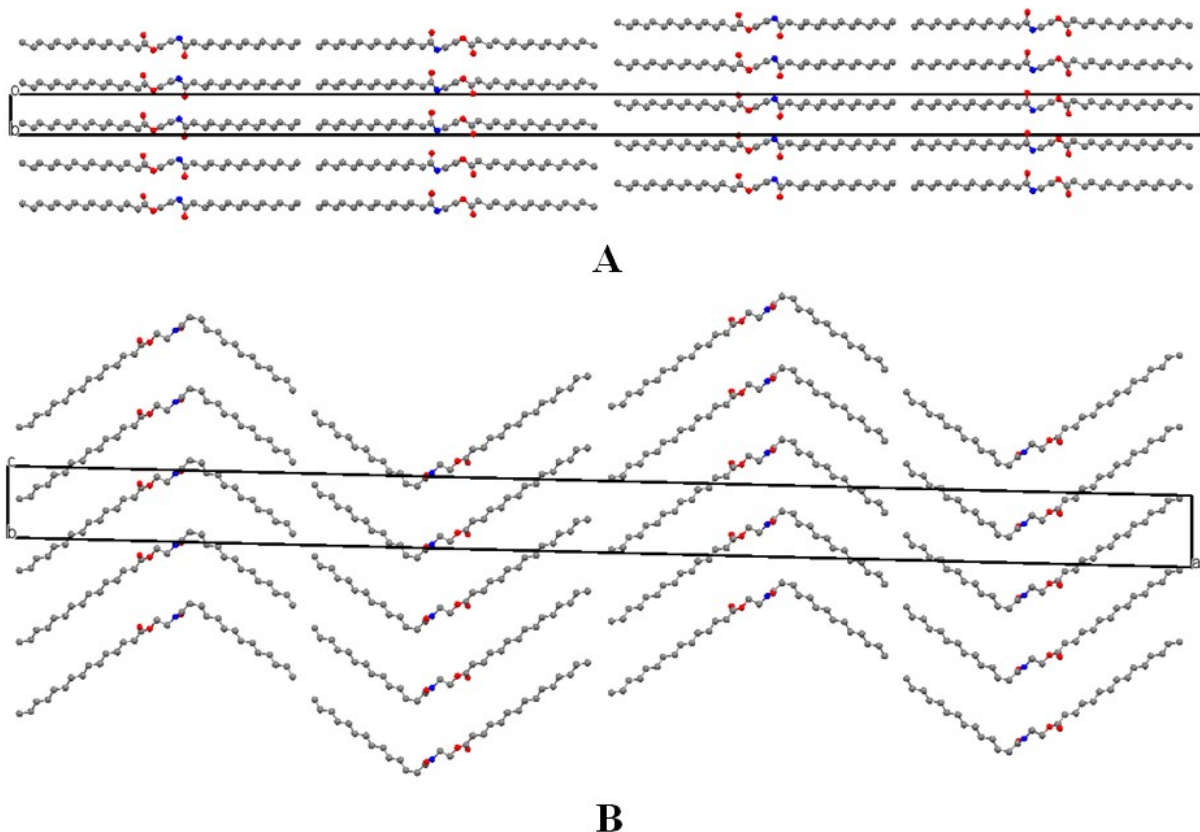

**Fig. S7.** Packing diagrams of N14-O15. (A) A view down the  $c$ -axis. (B) A view down the  $b$ -axis. Length of hydrophobic region is also indicated. The crystal lattice of N14-O15 has two different types of hydrophobic regions, one shorter in length and other longer.

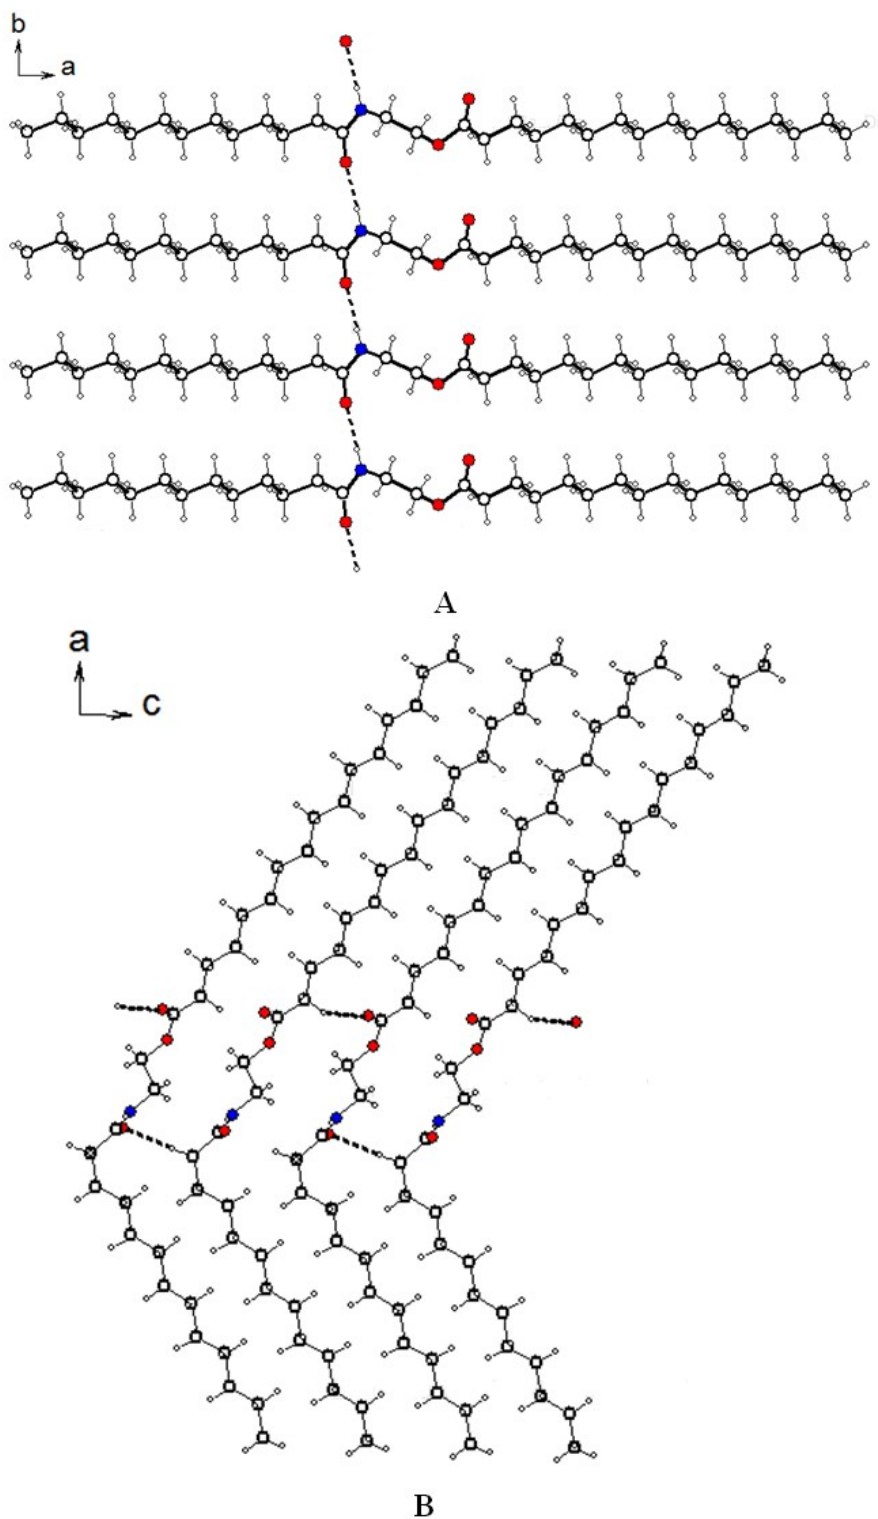

**Fig. S8.** A view of hydrogen bonding pattern in the crystal lattice of N13-O16 along the *c*-axis displaying N–H···O type hydrogen bonding interactions (A), and along *b*-axis displaying C–H···O type hydrogen bonding interactions (B).

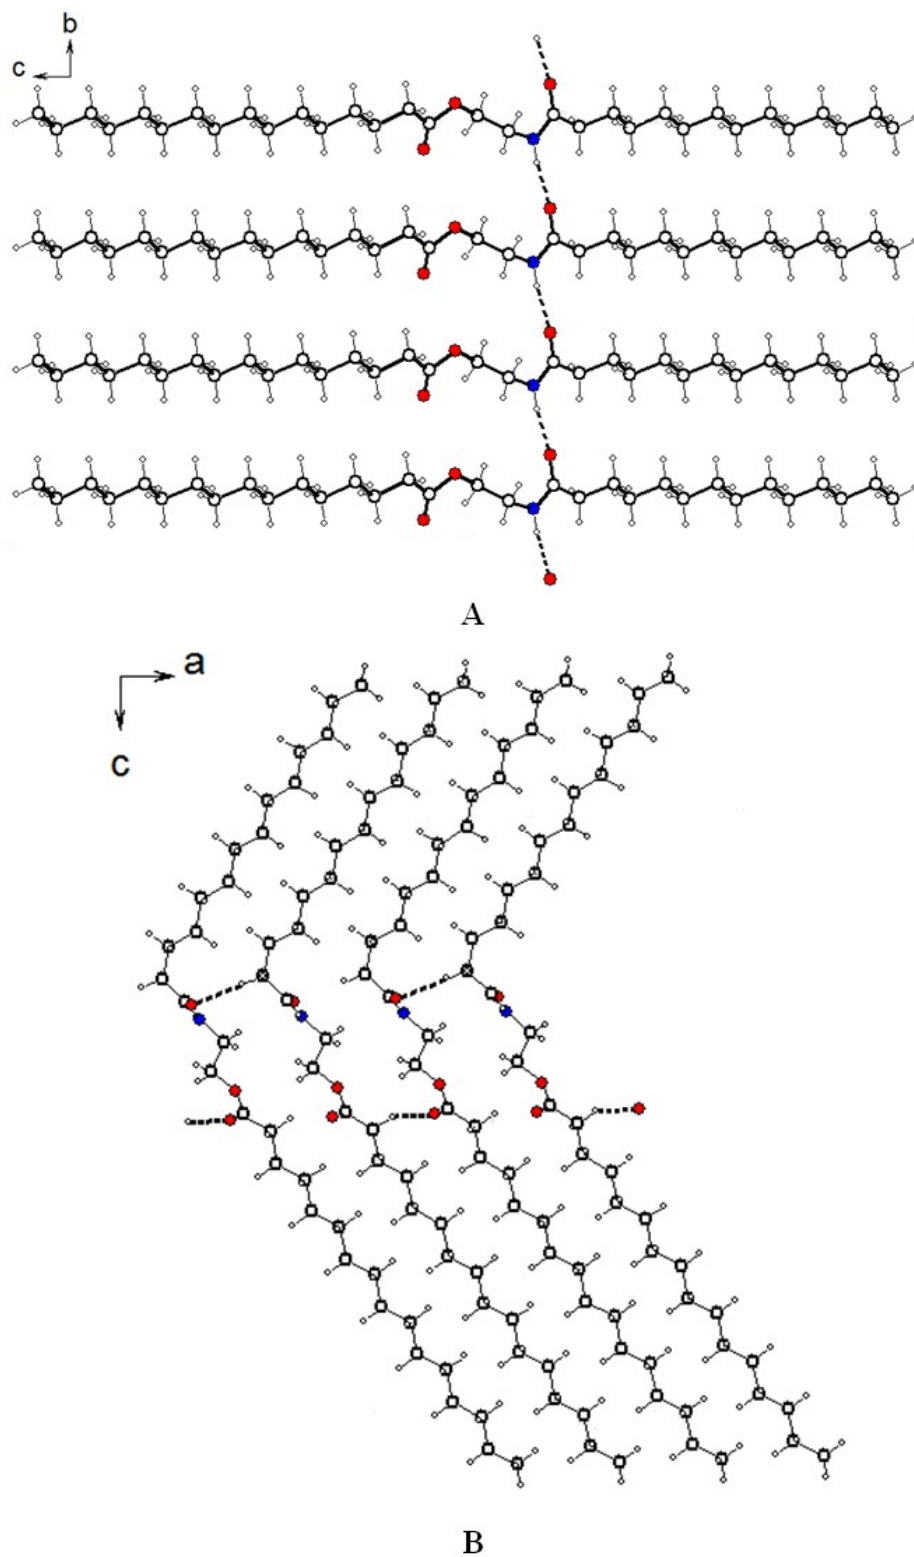

**Fig. S9.** A view of hydrogen bonding pattern in the crystal lattice of N14-O16 along the *a*-axis displaying N–H···O type hydrogen bonding interactions (A), and along *b*-axis displaying C–H···O type hydrogen bonding interactions (B).



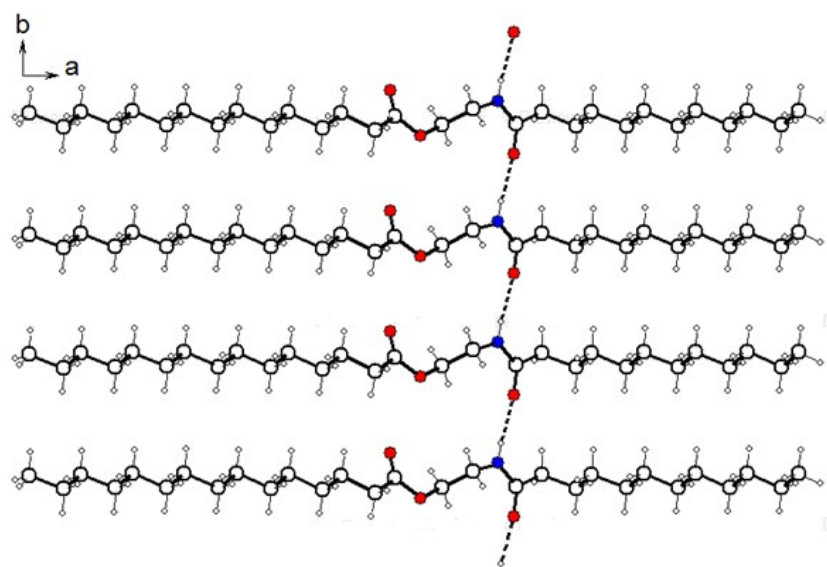

A

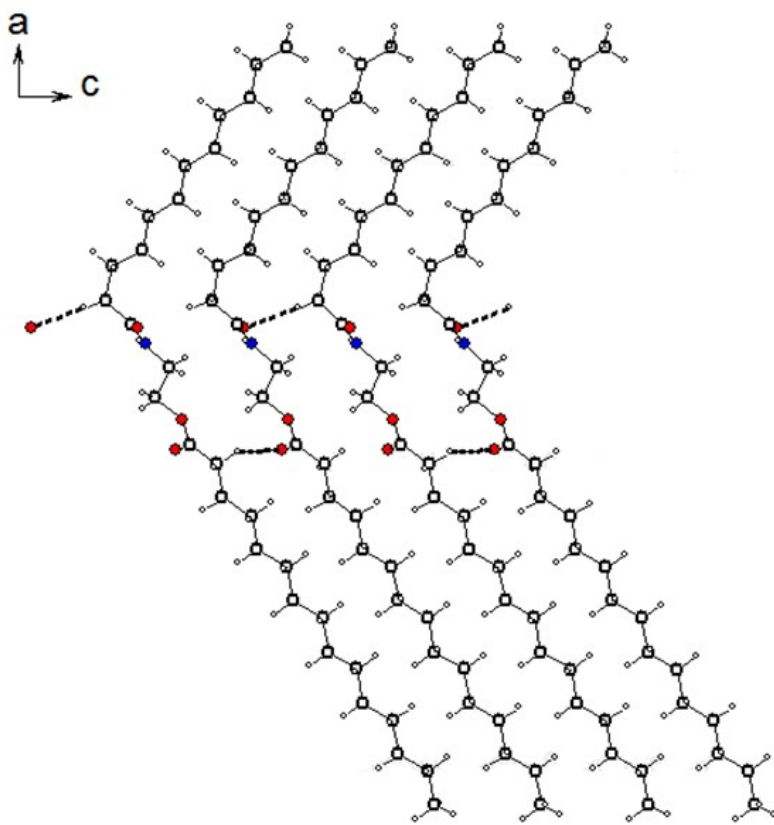

B

**Fig. S10.** A view of hydrogen bonding pattern in the crystal lattice of N12-O15 along the *c*-axis displaying N–H···O type hydrogen bonding interactions (A), and along *b*-axis displaying C–H···O type hydrogen bonding interactions (B).

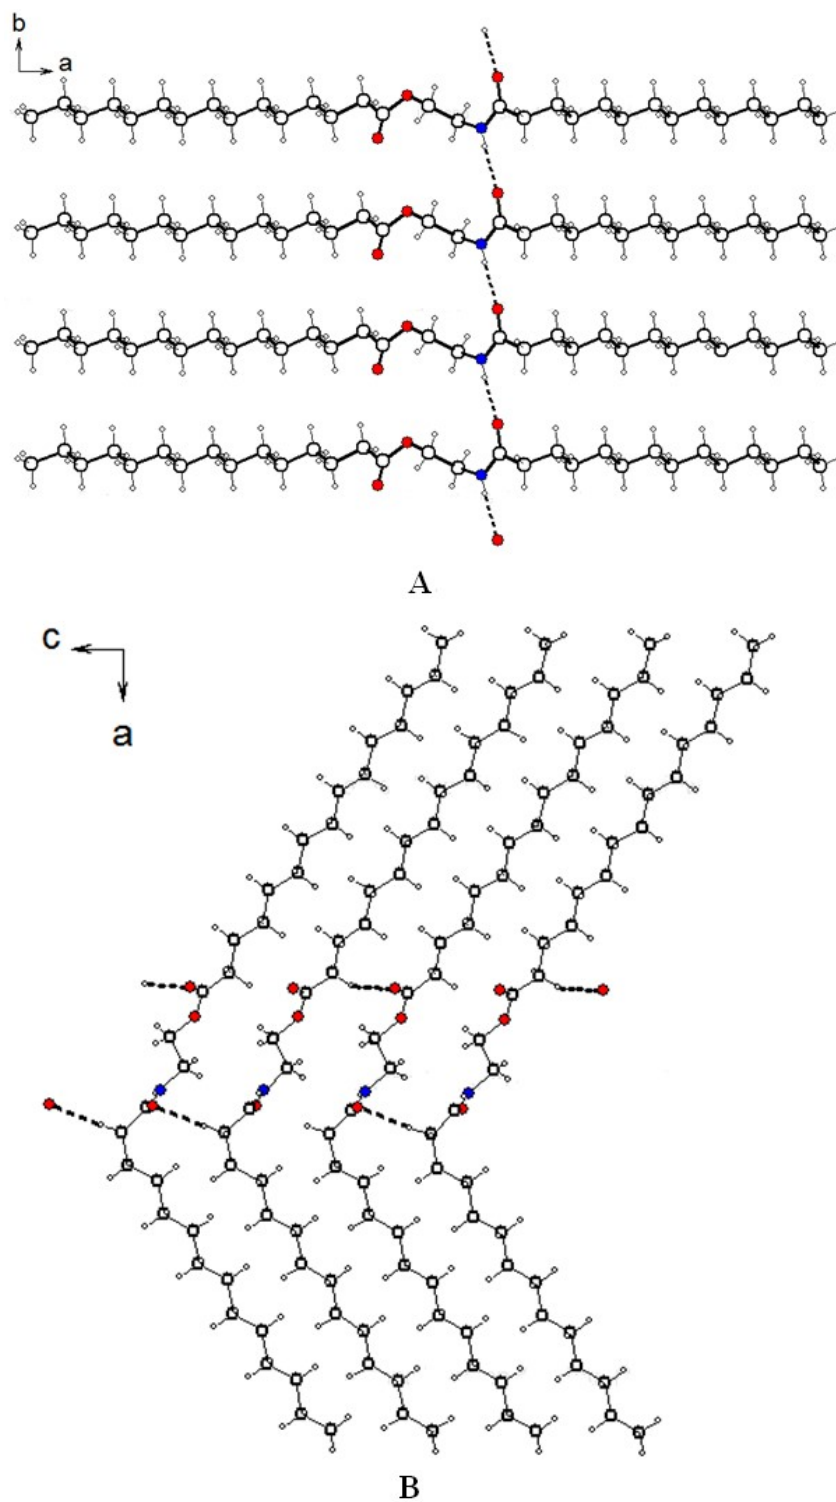

**Fig. S11.** A view of hydrogen bonding pattern in the crystal lattice of N14-O15 along the *c*-axis displaying N–H···O type hydrogen bonding interactions (A), and along *b*-axis displaying C–H···O type hydrogen bonding interactions (B).

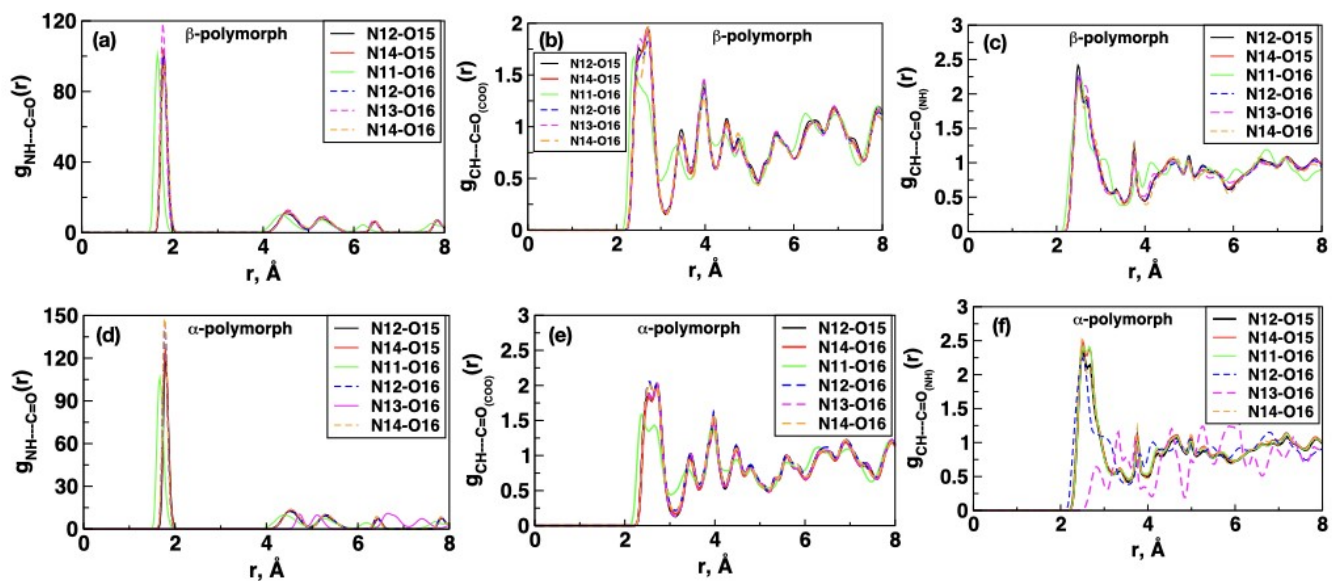

**Fig. S12.** Radial distribution function plot for N-H $\cdots$ O (a-b), C-H $\cdots$ O (amide oxygen) (c-d) and C-H $\cdots$ O (carboxyl oxygen) (e-f) in  $\alpha$  and  $\beta$  polymorphs of N14-O16, N12-O15, N12-O16, N14-O15 and N13-O16.

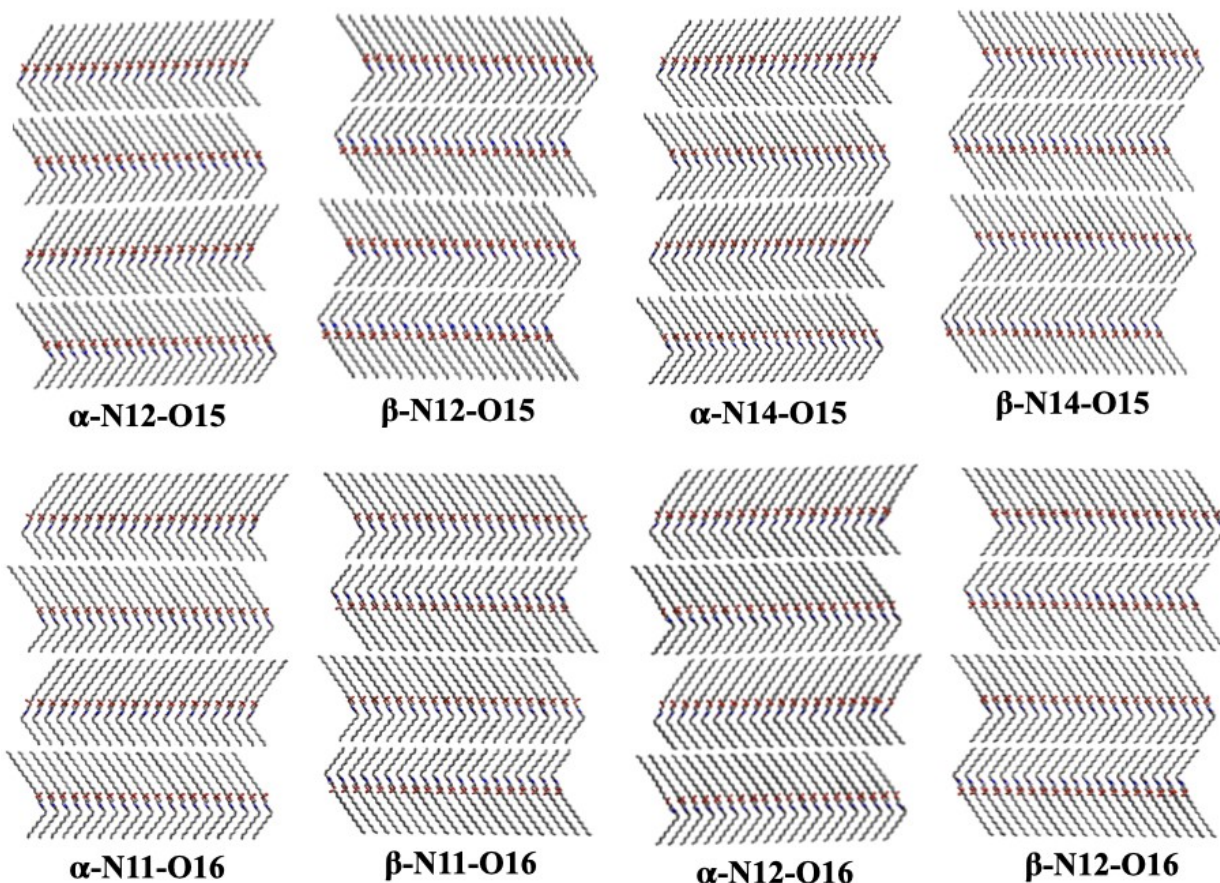

Fig S13a. VMD snapshots of simulated structures of  $\alpha$  and  $\beta$  polymorphs of N12-O15, N14-O15, N11-O16 and N12-O16 at 100K.

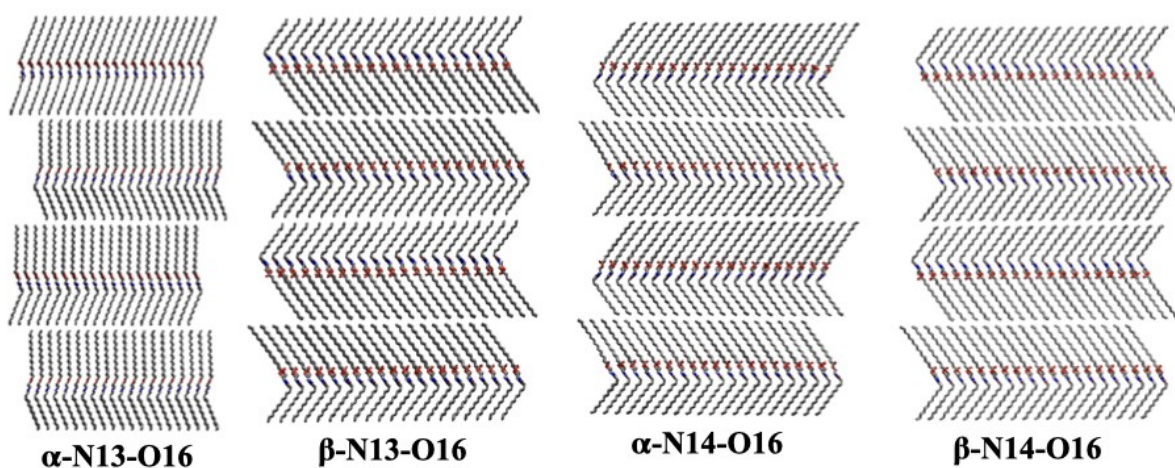

Fig S13b. VMD snapshots of simulated structures of  $\alpha$  and  $\beta$  polymorphs of N13-O16 and N14-O16 at 100K.
